# Transcriptomic and functional mapping of autism associated environmental factors in developing human neurons

Abishek Arora<sup>1,2</sup>, Martin Becker<sup>1,2</sup>, Cátia Marques<sup>3</sup>, Marika Oksanen<sup>1,2</sup>, Danyang Li<sup>1,2</sup>, Francesca Mastropasqua<sup>1,2</sup>, Michelle Evelyn Watts<sup>1,2</sup>, Manish Arora<sup>4</sup>, Anna Falk<sup>5,6</sup>, Carsten Oliver Daub<sup>7,8</sup>, Ingela Lanekoff<sup>3</sup> and Kristiina Tammimies<sup>1,2,\*</sup>

<sup>1</sup>Center of Neurodevelopmental Disorders (KIND), Centre for Psychiatry Research, Department of Women's and Children's Health, Karolinska Institutet, and Child and Adolescent Psychiatry, Stockholm Health Care Services, Stockholm County Council, Stockholm, Sweden.

<sup>2</sup>Astrid Lindgren Children's Hospital, Karolinska University Hospital, Region Stockholm, Stockholm, Sweden

<sup>3</sup>Department of Chemistry - BMC, Uppsala University, Uppsala, Sweden.

<sup>4</sup>Department of Environmental Medicine and Public Health, Icahn School of Medicine at Mount Sinai, New York, USA.

<sup>5</sup>Department of Neuroscience, Karolinska Institutet, Stockholm, Sweden.

<sup>6</sup>Lund Stem Cell Center, Division of Neurobiology, Department of Experimental Medical Science, Lund University, Lund, Sweden.

<sup>7</sup>Department of Biosciences and Nutrition, Karolinska Institutet, Stockholm, Sweden.

<sup>8</sup>Science for Life Laboratory, Stockholm, Sweden.

\*Correspondence: [kristiina.tammimies@ki.se](mailto:kristiina.tammimies@ki.se)

Corresponding Author:

Kristiina Tammimies, PhD

Postal address: BioClinicum J9:30, Visionsgatan 4, 171 56 Solna, Sweden

E-mail: [kristiina.tammimies@ki.se](mailto:kristiina.tammimies@ki.se)

## ABSTRACT

Autism spectrum disorder (ASD) is a heterogeneous, early-onset neurodevelopmental disorder with multifactorial aetiology. There are hundreds of genes that contribute to ASD. Additionally, several environmental factors, such as neurotoxic compounds, endocrine modulators, and neuropsychiatric medications, have been associated with ASD outcomes. We investigated a highly efficient and multiplexable, fractional factorial experimental design to study multiple environmental factors and human induced pluripotent stem cell (iPSC) lines in the context of ASD. RNA expression analysis revealed significant upregulation of pathways related to synaptic function and lipid metabolism, following exposure to lead and fluoxetine, respectively. We validated our findings using mass spectrometry-based metabolomics after fluoxetine exposure. The study demonstrates that the fractional factorial experiment design can be used for multiplexed transcriptomic analyses to detect relevant changes at the pathway level. Our study provides a roadmap for understanding the impact of low-grade environmental exposures on human neurodevelopment. Expansive future studies will require multiple cell lines with different genetic backgrounds for characterising environmental exposures in ASD and other neurodevelopmental disorders.

# INTRODUCTION

Autism spectrum disorder (ASD) is a neurodevelopmental disorder (NDD) diagnosed in nearly 1-2% of the population (Lord et al., 2020). More than 100 genes are associated with ASD affected by both, common variants with small effect sizes and rare variants with larger effect sizes (Iakoucheva et al., 2019; Lord et al., 2020; Satterstrom et al., 2020). Heritability studies show that genetic factors account for 50 to 86.8% of ASD risk, suggesting that the remaining risk arises from environmental factors (Bai et al., 2019). Early exposure to chemical stressors may induce or exacerbate neurodevelopmental trajectories underlying ASD. Environmental factors associated with ASD include lead (Pb) (Heyer and Meredith, 2017), valproic acid (VPA) (Christensen et al., 2013; Moore, 2000), bisphenol A (BPA) (Thongkorn et al., 2019, 2021), ethanol (EtOH) (Stevens et al., 2013), fluoxetine hydrochloride (FH) (Boukhris et al., 2016) and zinc dysregulation (Arora and Austin, 2013; Arora et al., 2017). The majority of genes and environmental factors associated with ASD have also been implicated in other NDDs, suggesting more generalised effects on neurodevelopment rather than being ASD specific.

Despite the growing interest in environmental factors, the molecular mechanisms leading to the increased liability of behavioural and cognitive dysfunctions remain largely unknown, especially in genetically vulnerable conditions. The use of induced pluripotent stem cell (iPSC) derived neuronal cells, either from typically developed individuals or individuals with ASD, can enable the study of the effects of environmental factors during neurodevelopment (Pintacuda et al., 2021). As a large number of both genetic and environmental factors have been indicated in ASD, there is a need for efficient methods to estimate their effects during early development.

Fractional factorial experimental designs (FFED) (Mee, 2009), adapted from methods used in managerial and industrial processes, drastically reduce the number of samples required to observe effects with high statistical power. It is a subset of a full factorial design that increases experimental efficiency and makes it possible to study the interactions between different experimental conditions using statistical modelling.

Here, we present a multiplexed experimental design based on the FFED coupled with RNA-sequencing to perform simultaneous analyses of six environmental factors and four cell lines in the context of ASD vulnerability. The main outcomes were determined using transcriptional and pathway level analysis in early differentiating neurons from iPSCs. Furthermore, we validated the specific lipid pathways identified after exposure to FH using

mass spectrometry-based metabolome detection. We show that FFED-RNA-seq can help pinpoint relevant mechanisms related to ASD-associated environmental exposures, and that there is a need to model these effects in multiple genetic backgrounds.

## RESULTS

### Cellular effects of environmental factors

We evaluated the molecular effects of Pb, VPA, BPA, EtOH, FH and zinc deficiency (Zn-) in cell lines with different clinical backgrounds for ASD during early neuronal development (Figure 1A). The Non-ASD cell lines included two neurotypical controls (CTRL<sub>Male</sub>, CTRL<sub>Female</sub>), while the ASD cell lines included two males with a known ASD genetic variant (ASD<sub>CASK</sub>, ASD<sub>HNRNPU</sub>) as described earlier (Becker et al., 2020; Falk et al., 2012; Mastropasqua et al., 2022; Uhlin et al., 2017). For studying the effects of the six exposures, we set up an FFED framework (Table S1A).

First, we performed a cytotoxicity assay to test the exposure ranges of the six selected environmental factors in differentiating human iPSC-derived neuroepithelial stem (NES) cells. Exposure ranges were selected based on an extensive literature review as described in Table S1B–S1F and tested in the CTRL<sub>Male</sub> cell line. The highest concentration with no significant (Tukey post hoc  $p > 0.05$ ) or trending decrease in cell viability at 120 hours of exposure was selected for each environmental factor (Figure S1A); 3  $\mu$ M for Pb, BPA and FH, and 3 mM for VPA and EtOH. This was done to avoid the toxicity of a single environmental factor overshadowing the combined effects of the other factors. Based on the six factors, we fitted the L8 Orthogonal Array based FFED for our study (Table S1A). The selected concentrations were tested for cytotoxicity using the MTS assay in the FFED. At 120 hours of exposure, a significant difference (Tukey post hoc  $p < 0.05$ ) in cell viability was only observed for Pb, VPA and EtOH (Figure S1B). Based on the observed cytotoxicity effects of VPA during NES cell differentiation, the exposure concentration was adjusted to 3.0  $\mu$ M.

Next, we tested if the exposures affected the rate of neuronal maturation in two of the four cell lines, CTRL<sub>Male</sub> and ASD<sub>CASK</sub>, by analysing the rate of SOX2 positive cells at day 5 of exposure using the FFED. No significant changes (Tukey post hoc  $p > 0.05$ ) in the number of SOX2 positive cells were detected for any of the exposures (Figure S1C). Additionally, we tested for any proliferation changes using the BrdU assay at day 5 in all the cell lines. A significant decrease in proliferation was detected after exposure to Pb in the ASD<sub>CASK</sub> cell line (Tukey post hoc  $p < 0.001$ , Figure S1D).

## Approaching multiplexed exposures and gene expression

We investigated if FFED coupled with RNA-seq could detect relevant transcriptomic changes after low-grade environmental exposures on differentiating human neurons for 5 days. We performed RNA-seq using the L8 orthogonal array for the four cell lines (n=32). We included a biological replicate of the full set for CTRL<sub>Male</sub> (n=8) and a partial set for CTRL<sub>Female</sub> (n=4), for variability and sample size testing. Principal component analysis (PCA) of the RNA-seq data (n=43) showed that the genetic background of the samples was the main driver of the differences across PC1 (46.12%) and PC2 (33.57%), and the exposure effects were minimal for the total variation in the transcriptomic profiles (Figure S2A and S2B).

We then performed identification of differentially expressed genes (DEGs) and gene-set enrichment analysis (GSEA) for enriched pathways at three levels. Briefly, at *Level I – Global Effects*, exposure effects were analysed across all cell lines; *Level – II, Clinical Background Effects*, exposure comparisons were made separately for two groups: non-ASD and ASD cell lines; and *Level III – Cell Line Effects*, exposure effects were analysed for every individual cell line (Figure 1B).

## Early exposure effects of environmental factors

In the global analyses (*Level I*), no genes responding to BPA, VPA, EtOH and Zn- exposures (adj.  $p > 0.05$ ) were identified. Nevertheless, pathway analysis highlighted biological processes following these exposures (Table S3A and S3B). For BPA, twelve pathways were significantly upregulated, including protein lipid complex assembly ( $q = 0.0027$ ) and mitochondrial membrane organisation ( $q = 0.032$ ), and one pathway was significantly downregulated, detection of chemical stimulation involved in sensory perception ( $q = 0.035$ ). For VPA, thirty pathways were significantly downregulated, including neuron projection guidance ( $q = 0.0023$ ) and axon development ( $q = 0.0089$ ). For EtOH and Zn-, negative regulation of endothelial cell apoptotic process ( $q = 0.0017$ ) and positive chemotaxis ( $q = 0.048$ ) were the only significantly upregulated pathways, respectively. Additionally, for Zn- three pathways were significantly downregulated: plasminogen activation ( $q = 0.0006$ ), protein activation cascade ( $q = 0.0048$ ) and fibrinolysis ( $q = 0.0066$ ).

We detected significant changes in genes responding to Pb (69 genes, adj.  $p < 0.05$ , Table S2A, Figure 2A) and FH (50 genes, adj.  $p < 0.05$ , Table S2H, Figure 2C). Furthermore, pathway analysis revealed several biological processes affected by the exposures (Figure 2B and 2D). Amongst the upregulated pathways after Pb exposure (Table S3A) were cholinergic synaptic transmission ( $q = 0.0099$ ), axon extension ( $q = 0.012$ ), and synapse assembly ( $q = 0.012$ ).

Significantly downregulated pathways (Table S3B) were negative regulation of receptor signalling pathway via STAT ( $q=0.0091$ ), regulation of heterotypic cell adhesion ( $q=0.043$ ) and axoneme assembly ( $q=0.046$ ). For FH (Table S3A), the significantly upregulated pathways included alcohol biosynthetic process ( $q<0.0001$ ), sterol biosynthetic process ( $q<0.0001$ ), and regulation of steroid metabolic process ( $q<0.0001$ ). There were six significantly downregulated pathways detected (Table S3B), including motile cilium assembly ( $q=0.015$ ), axonemal dynein complex assembly ( $q=0.018$ ) and cilium movement ( $q=0.035$ ).

To assess the involvement of the genes responding to Pb and FH exposures across spatio-temporal trajectories during human neurodevelopment, we analysed their expression using available RNA-seq data from the BrainSpan Consortium (Miller et al., 2014). The genes responding to Pb (Figure S2C) and FH (Figure S2E) both formed two groups for early and late neurodevelopment. Both Pb (Figure S2D) and FH (Figure S2F) gene groups were significantly (adj.  $p<0.05$ ) detected in the frontal cortex, temporo-parietal cortex, sensorimotor cortex, and subcortical regions. When considering their role across developmental periods, Pb genes (early) were significantly identified (adj.  $p<0.05$ ) in all brain regions from the late mid-foetal period (19-24 weeks), other than in the subcortical region that was only significant (adj.  $p<0.05$ ) from the early foetal period (0-12 weeks). For FH (late), the genes were significantly found (adj.  $p<0.05$ ) in all studied brain regions, however, were limited to postnatal periods of neurodevelopment.

Additionally, we tested for enrichment of the responding genes in neurodevelopmental disorder gene lists, including SFARI for ASD (Banerjee-Basu and Packer, 2010), Genetic epilepsy syndromes (EPI) panel (Stark et al., 2021), intellectual disability (ID) panel (Stark et al., 2021) and a general developmental gene list (Li et al., 2021). No significant findings were observed (adj.  $p>0.05$ ).

### **Convergence of affected molecular pathways for all exposures**

Several shared biological processes were revealed, when we analysed the molecular pathways across environmental factor exposures (*Level I* analysis). There was significant upregulation detected (Table S3A) in glycosphingolipid metabolic processes (FH  $q=0.034$ , Pb  $q=0.023$ ), steroid catabolic processes (FH  $q=0.0003$ , Pb  $q=0.016$ ), terpenoid metabolic processes (BPA  $q=0.046$ , FH  $q=0.031$ ), negative regulation of endothelial cell apoptosis (EtOH  $q=0.0017$ , FH  $q=0.003$ ), synaptic vesicle priming (FH  $q=0.014$ , Pb  $q=0.018$ ) and cholinergic synaptic transmission (FH  $q=0.015$ , Pb  $q=0.01$ ). Significantly downregulated biological processes (Table S3B) detected were axoneme assembly (FH  $q=0.0008$ , Pb  $q=0.046$ ) and microtubule

bundle formation (FH  $q=0.0065$ , Pb  $q=0.05$ ). The summary network of the six exposures, indicated connected nodes across the exposures for several of the upregulated clusters and only singleton nodes for the downregulation (Figure 2E, Table S4A and S4B).

### Clinical background modulates exposure effects

Similar pathway analyses were performed for *Level – II, Clinical Background Effects*, by analysing Non-ASD cells (CTRL<sub>Male</sub> and CTRL<sub>Female</sub>; Table S2B and S2I) and ASD cells (ASD<sub>CASK</sub> and ASD<sub>HNRNPU</sub>; Table S2C and S2J) separately. The environmental factor exposures uniquely and commonly modulated several pathways. A total of 460 biological processes were upregulated (Table S3C) and 79 were downregulated (Table S3D) in the Non-ASD cells. In the ASD cells, 861 pathways were upregulated (Table S3E), while 17 pathways were downregulated (Table S3F). The summary networks were used to visualize hub nodes (Table S4C and S4D, Figure S3A and S3C for the Non-ASD group; Table S4E and S4F, Figure S3F and S3D for the ASD group).

Furthermore, we analysed the global network properties of the Non-ASD and ASD cell responses to the environmental factor exposures to represent the differential responses. In the upregulation network for Pb, the diameter measuring the network size, was greater for the ASD group (17.0) than the Non-ASD group (7.0). In contrast, the clustering coefficient indicating the nodal neighbourhood connectivity was higher of the Non-ASD group (0.68) than the ASD group (0.54). The average degree, representing the number of edges per node in a network, was conversely higher in the ASD group (8.06) than the Non-ASD group (6.67). Interestingly, no downregulation network could be generated for the ASD group based the selected thresholds ( $q<0.05$ ). For the upregulation network of FH, the diameter of the Non-ASD group (18.0) was larger than the ASD group (4.0). The clustering coefficient was greater for the ASD group (0.95) than for the Non-ASD group (0.59), while the average degree was higher for the Non-ASD group (7.53) when compared to the ASD group (5.72). Similar to Pb, no downregulation network could be generated for FH exposure in the ASD group.

Lastly, we performed the *Level III* analyses for each cell line (Table S2D–S2G and S2K–S2N). Several pathways were found to be significantly modulated (Table S5). Interestingly, the exposures per cell line modulated several unique biological processes. For Pb, significantly ( $q<0.05$ ) upregulated unique pathways (Table S5A), were indicated for all cell lines, however the ASD<sub>HNRNPU</sub> showed largest effects with 1105 significantly upregulated pathways overall. While Pb-driven significantly downregulated pathways (Table S5B) had the largest effects in CTRL<sub>Male</sub> with 266 out of 290 pathways that were significantly downregulated



overall. In the case of FH, significantly ( $q < 0.05$ ) upregulated pathways (Table S5C) were mostly detected in CTRL<sub>Male</sub> (250 out of 378 pathways) and none in ASD<sub>CASK</sub>. FH-driven significant downregulated pathways (Table S5D) were identified mostly in CTRL<sub>Male</sub> (75 out of 85 pathways) with a few in CTRL<sub>Female</sub>, such as spliceosomal snRNP assembly (CTRL<sub>Male</sub>  $q < 0.0001$ ) and cilium movement (CTRL<sub>Female</sub>  $q = 0.0002$ ). Pb and FH exposure effects on the cell lines were visualised using summary network analysis for upregulated (Figure 3A and 3C, Table S4G and S4I, respectively) and downregulated (Figure 3B and 3D, Table S4H and S4J, respectively) common clusters.

BPA predominantly modulated pathways with significance ( $q < 0.05$ ) in CTRL<sub>Male</sub> (upregulated 138 out of 139 pathways, downregulated 1 out of 1 pathway) (Table S5E). On the other hand, EtOH and VPA predominantly upregulated pathways (Table S5I and S5G, respectively) with significance in CTRL<sub>Female</sub> (EtOH: 67 out of 72 pathways, VPA: 5 out of 5 pathways). VPA-driven significant downregulation (Table S5H) of pathways was detected mainly in CTRL<sub>Female</sub> (37 out of 84 pathways) and ASD<sub>CASK</sub> (51 out of 84 pathways). Zn-significantly upregulated pathways (Table S5J) mainly in CTRL<sub>Male</sub> (21 out of 34 pathways), such as ribosome biogenesis (CTRL<sub>Male</sub>  $q = 0.0133$ ) and translation initiation (CTRL<sub>Male</sub>  $q = 0.0332$ ). The significantly downregulated pathways (Table S5K) like protein activation cascade (CTRL<sub>Female</sub>  $q < 0.0001$ ) and sterol import (CTRL<sub>Female</sub>  $q = 0.0248$ ) were primarily detected in CTRL<sub>Female</sub> (34 out of 40 pathways).

### Detecting interaction effects with FFED

In addition to single exposures, the FFED design enabled exposure interaction analyses. In our design, we were able to analyse three two-way interactions (*Level IV* analyses): Pb – Zn-, VPA – FH, and BPA – EtOH. However, interaction modulated genes were only detected in CTRL<sub>Male</sub> when analysing for interaction effects. This could be attributed to the presence of two full biological replicates of the FFED design (Table S1A). Several biological processes were modulated by the two-way interactions (Table S6A and S6B) and in the summary network several clusters were identified. Significant upregulation (Table S6C, Figure S3B) was detected in nucleosome organization assembly (BPA – EtOH  $q = 0.035$ ), mitochondrial electron respiration (Pb – Zn-  $q = 0.015$ ), membrane raft organization (Pb – Zn-  $q = 0.040$ ), lipoprotein density particle (VPA – FH  $q = 0.023$ ) and steroid biosynthetic process (VPA – FH  $q = 0.034$ ). Significant downregulation (Table S6D, Figure S3E) was detected in clusters such as G1 phase cell cycle (Pb – Zn-  $q = 0.015$ ), chromatin remodelling (Pb – Zn-  $q = 0.0023$ ), kinetochore



organization assembly (Pb – Zn-  $q=0.0034$ , VPA – FH  $q=0.015$ ), and snRNP biogenesis (VPA – FH  $q=0.0071$ ).

### **Lead and Bisphenol A induce alternative splicing events**

After investigating gene response differences, we performed differential exon usage (DEU) analysis on the *Level I* to *III* comparisons (Table S7A). In line with the gene response analysis, Pb exposure presented significant effects on alternative splicing. Pb exposure induced more alternative splicing events in the ASD group (45 genes) compared to the Non-ASD (4 genes). In addition to Pb, BPA also affected alternative splicing. BPA exposure caused extensive alternative splicing events on the global level (223 genes) and in the Non-ASD group (346 genes). Furthermore, in the female control cell line, CTRL<sub>Female</sub>, alternative splicing events were detected following analysis in both the full set (381 genes) and excluded partial set (868 genes). No alternative splicing events were detected after exposure to the other environmental factors.

The genes with alternative splicing events in CTRL<sub>Female</sub> after BPA exposure (partial set, 868 genes) were over-represented in several biological processes (Table S7B, Figure S3G). These included cytoskeleton organisation (adj.  $p=0.0091$ ), neuron development (adj.  $p=0.036$ ), regulation of RNA splicing (adj.  $p=0.0359$ ), neuron differentiation (adj.  $p=0.048$ ) and intracellular protein transport (adj.  $p=0.044$ ). No significant enrichment (adj.  $p<0.05$ ) in biological processes were detected for the genes driving alternative splicing events following Pb exposure at all levels of analyses.

Furthermore, genes with significant alternative splicing events following BPA exposure in CTRL<sub>Female</sub> were tested for enrichment in publicly available gene lists, as previously done for significantly responding genes. Significant enrichment was observed in the SFARI gene list (adj.  $p=0.045$ ), SFARI high confidence gene list (adj.  $p=0.022$ ), ID panel (adj.  $p=0.0045$ ) and developmental gene list (adj.  $p=0.0013$ ). No significant enrichment (adj.  $p>0.05$ ) was detected in the EPI panel.

### **Fluoxetine alters lipid metabolism during neuronal differentiation**

As we revealed an extensive dysregulation of lipid metabolism related pathways in the transcriptomic profiles after FH exposures, we set out to validate the findings using direct infusion electrospray ionisation mass spectrometry (ESI-MS) for metabolomics (Figure 1C). We initially evaluated over 2500 metabolite signals, including adducts, for FH exposure effects, out of which 79 were selected and reported based on their signal threshold level. At the

*Level I* analysis for global effects, we could confirm several lipid-based metabolites to be significantly elevated after exposure to FH, including fatty acids (FA 18:1, adj.  $p=0.0015$ ; FA 20:2, adj.  $p=0.0056$ ; FA 20:3, adj.  $p=0.0040$ ), plasmalycholines (PC e 32:0, adj.  $p=0.0006$ ; PC e 32:1, adj.  $p=0.0003$ ) and the phosphatidylethanolamine, PE 36:4 (adj.  $p=0.0062$ ) (Figure 4A, Table S8A).

When separating for the clinical background (*Level II*) effects, several shared metabolites showed a significant elevation following FH exposure, however, with a difference in magnitude of concentrations, including fatty acids FA 20:2 (Non-ASD  $q=0.0217$ ; ASD  $q=0.0320$ ), FA 20:3 (Non-ASD  $q=0.0134$ , ASD  $q=0.0198$ ); phosphatidylcholines PC 34:3 (Non-ASD  $q=0.0245$ , ASD  $q=0.0313$ ), PC 36:3 (Non-ASD  $q=0.0246$ , ASD  $q=0.0432$ ) and phosphatidylethanolamines PE 34:2 (Non-ASD  $q=0.0032$ , ASD  $q=0.0007$ ), and plasmalethanolamine PE e 38:4 (non-ASD  $q=0.0189$ , ASD  $q=0.0022$ ) (Figure 4D, Table S8B and S8C).

Furthermore, we detected several metabolites that were elevated significantly only in either of the clinical background groups. For the Non-ASD cell lines, additional 11 metabolites showed significant changes, including aspartic acid ( $q=0.0436$ ), PC e 32:0 (adj.  $p=0.0003$ ), PE 34:2 (adj.  $p=0.0033$ ) and PE e 40:5 (adj.  $p=0.0072$ ) (Figure 4B, Table S8B). For the ASD cell lines, seven unique metabolites showed significant changes, including FA 18:2 (adj.  $p=0.0009$ ), PE 38:3 (adj.  $p=0.0280$ ), PE e 40:4 (adj.  $p=0.0426$ ) and SM 16:0 (adj.  $p=0.0409$ ) (Figure 4C, Table S8C).

At the *Level III* analysis for cell line effects, in addition to some of the earlier significant metabolites, few more metabolites were also significantly elevated. In CTRL<sub>Male</sub> (Table S8D), PC e 32:0 (adj.  $p=0.020$ ) and PC e 32:1 (adj.  $p=0.0068$ ) were elevated upon FH exposure, while no metabolites were significantly elevated in CTRL<sub>Female</sub> (Table S8E). In ASD<sub>HNRNPU</sub> (Table S8F), significant elevation was detected in six metabolites including FA 20:3 (adj.  $p=0.033$ ), PE 34:2 (adj.  $p=0.033$ ) and PC 34:4 (adj.  $p=0.048$ ). Five additional metabolites were significantly elevated in ASD<sub>CASK</sub> (Table S8G) including PE e 38:4 (adj.  $p=0.012$ ), PE 38:3 (adj.  $p=0.0010$ ) and PE 36:4 (adj.  $p=0.0015$ ).

## DISCUSSION

As the identification of both genetic and environmental factors in ASD and other NDDs is increasing, there is a need for efficient, multiplexable platforms to model their effects and interactions during early neuronal development. Here, we describe our study using FFED

coupled with RNA-seq to identify affected biological pathways in a human iPSC derived model of early neurodevelopment, followed by a layered analytical pipeline. We find modest but significant changes at the pathway level after low-grade exposure with six selected environmental factors and showed the feasibility of separating the effects at different levels of complexity, vis-à-vis global, clinical background, and cell line effects, independently and as two-way interactions.

A means to highlight the efficiency and utility of the FFED would be to compare the input sample count in similar transcriptomic studies. While we performed RNA-seq on 32 samples and in-depth analysis to study the effects of six environmental factors, a theoretical full design study would require 120 samples to study 6 factors in 4 cell lines using 5 technical replicates. Similarly, a conventional experiment design to investigate the effects of Pb at two different concentrations on human neural progenitor cells used 60 samples (Jiang et al., 2017). A recent report analysing the effects of a mixture of endocrine disrupting chemicals on neurodevelopment and language delay in human cerebral organoids and *in-vivo* models, generated vast insights on perturbed regulatory networks (Caporale et al., 2022). The FFED, would not only make it possible to analyse such interaction effects, but simultaneously decipher independent effects too, creating an in-depth transcriptomic profile with the same or even lower levels of sampling. As in the future, we need to better model complex mixtures of environmental factors across different doses and time points *in-vitro* (Austin, 2019; Caporale et al., 2022; Curtin et al., 2018), the FFED approach will prove advantageous for such research.

In addition to showing the usefulness of the FFED method to increase the experimental efficiency for transcriptomics or other high-throughput techniques, we have also gained insight into the biological mechanisms of the studied environmental factors. Several of the pathways identified to be changed have been linked to ASD through genetic studies (Eyring and Geschwind, 2021; Satterstrom et al., 2020). These pathways were found to be differentially modulated by the six environmental factors, however, such effects were predominantly driven by the exposures of Pb and FH. It is important to note here that these effects represent sustained, steady state transcriptomic responses following low-grade environmental exposure for 5 days and therefore provide stable insights with greater translational value.

We detect several relevant transcriptomic changes in the neuronal cells after low-grade exposure to Pb, primarily related to synaptic function. Our findings support previous reports on Pb exposure effects, a well-known neurotoxicant linked to cognitive impairments, ASD, and other NDDs (Heyer and Meredith, 2017; Neal and Guilarte, 2010). *In-vitro* studies looking at the mechanism of Pb action with the help of primary neuronal cultures showed that Pb can

affect synaptic plasticity (Neal and Guilarte, 2010) and the expression of multiple ASD susceptibility genes (Jiang et al., 2017). These reports suggest that Pb induces modulation of selected genes implicated in vesicle release, neurite growth, synaptogenesis, and transcription factors involved in neuronal differentiation (Sanchez-Martin et al., 2013). Our analyses align with the earlier studies, as we detect upregulated pathways related to axonogenesis and synaptogenesis. Interestingly, we also observed a large cluster of downregulated pathways related to DNA repair, cell cycle/division, and nucleosome remodelling. While such effects are known cytotoxic changes induced by Pb exposure (Gidlow, 2015; Hartwig, 1994; Jannuzzi and Alpertunga, 2016; Senut et al., 2012), these changes have also been previously identified in ASD (Courchesne et al., 2019; Markkanen et al., 2016; Mossink et al., 2021; Satterstrom et al., 2020).

Another exposure resulting in large pathway level changes was FH, a commonly prescribed SSRI for depression and anxiety disorders. We show that FH modulates transcriptomic pathways related to lipid metabolism, which we also functionally validated using ESI-MS. We indicate an increase in lipid-based metabolites following FH exposure in early developing neurons. The importance of lipids in the human brain is well known, which has the highest lipid content after adipose tissue (Hamilton et al., 2007). Neuronal progenitor cells are rich in lipid droplets and their abundance influences the proliferative state of such progenitors, which may also contribute to cell fate determination (Ramosaj et al., 2021). In neural embryonic stem cells, FH exposure at different time points of neuronal stem cell differentiation was shown to alter cell type markers (de Leeuw et al., 2020). Mechanistically, FH binds to the transmembrane domain of the dimerised neurotrophic tyrosine kinase receptor 2 (TKRB), otherwise responsible for long-term potentiation thorough brain derived neurotrophic factor (BDNF) signalling, which we also detect as altered after FH exposure (Casarotto et al., 2021).

How the changes in lipid metabolism during early neuronal development would affect outcomes such as ASD later in life, requires further investigation. Nevertheless, it is still intriguing to note that deviations in lipid profiles have been previously observed in individuals with ASD. In a systematic review by Esposito and colleagues, 37 studies linking ASD to abnormal lipid profiles were identified (Esposito et al., 2021), showing an association between ASD and hypocholesterolaemia but unclear association for fatty acids. Furthermore, recently, hypolipidemia was identified in 367 individuals with an ASD diagnosis (Tierney et al., 2021). We also noted that the baseline concentrations for many of the affected lipids were lower in the Non-ASD cell line, and these get elevated following short-term FH exposure in both

groups. While transcriptomic enrichment of lipid-based pathways has been noted in ASD (David et al., 2016) with an increasing interest in defining an ASD subtype based on dyslipidaemia (Luo et al., 2020), we provide evidence that FH exposure in early development could alter metabolomic pathways, thereby suggesting the investigation of long-term exposure effects as well as comparisons with other SSRIs should be made.

Interestingly, evidence of FH effects on lipid metabolism has started gaining traction. For instance, long term exposure to FH for 2 years in male rhesus macaques decreased polyunsaturated fatty acids in the medial prefrontal cortex (Tkachev et al., 2021). An increase in serum lipid levels was observed in patients of clinical depression following treatment with FH for 8 weeks (Pan et al., 2018). Even though there has been uncertainty regarding the direction of such changes, a report on FH effects in a murine model of depression revealed that the nature of the biological sample used in a metabolomic investigation is a key determinant of the observed lipid patterns (Zhao et al., 2019).

We also provide proof that when investigating effects of environmental exposures using *in-vitro* cellular models, diverse genetic backgrounds need to be taken into consideration. When analysing the effects separately for the clinical background and cell lines, several significantly enriched pathways were found to be predominantly affected by the exposure of Pb and FH, with both independent and combined effects. Remarkably, with a higher network diameter, Pb had a larger upregulatory response in the ASD group (ASD<sub>CASK</sub>, ASD<sub>HNRNPU</sub>), while FH had such an impact on the Non-ASD group (CTRL<sub>Male</sub>, CTRL<sub>Female</sub>). This could signify that the ASD group is more vulnerable to Pb, and the Non-ASD group is to FH, thereby showing a larger transcriptomic response to the factors respectively. Additionally, few pathways modulated by VPA, BPA, EtOH and Zn- were also detected. What was particularly interesting was the ability of BPA to induce differential exon usage events in developing human neurons. To find such changes by an already established endocrine disruptor (Caporale et al., 2022) with previously reported effects on alternative splicing (Kim et al., 2021), emphasises the necessity to carry out further research in the context of NDDs.

Our study shows that the FFED is a promising design to generate multiplexed data, when evaluating the effects of several factors on biological outcomes. We have shown that it is possible to translate from exploratory analysis to functional validation with the FFED. We saw robust effects after the Pb and FH exposures in the four cell lines included in the study, but only modest pathway level changes for the other four exposures. A majority of such pathway level changes were also unique to one cell line, which demonstrated a need for larger studies with several cell lines, selected based on genetic and clinical profiles. In conclusion,

we have provided evidence for an efficient and multiplexable resource that can be used for better understanding the functional ramifications of environmental factors and gene-environment interactions in ASD and other clinical conditions with neurodevelopmental links. A molecular level understanding of the biological underpinnings of both genetic and environmental factors is essential for identifying plausible aetiologies and emergent future preventive interventions in ASD.

## **SUPPLEMENTAL INFORMATION**

Supplemental information can be found online.

## **ACKNOWLEDGMENTS**

The authors are grateful to the donors of the cell lines and for their participation in this research. The authors acknowledge support from the National Genomics Infrastructure in Stockholm funded by Science for Life Laboratory, the Knut and Alice Wallenberg Foundation and the Swedish Research Council, the SNIC/Uppsala Multidisciplinary Center for Advanced Computational Science for assistance with massively parallel sequencing and access to the UPPMAX computational infrastructure, and the iPS Core facility at Karolinska Institutet for assistance with the generation of iPSC and NES cells. The project was supported by the Swedish Research Council (A.F., and K.T.), Swedish Foundation for Strategic Research (A.F., and K.T.), the Swedish Brain Foundation – Hjärnfonden (A.F., and K.T.), the Harald and Greta Jeansson's Foundations (K.T.), Åke Wiberg Foundation (K.T.), Strategic Research Area Neuroscience Stratneuro (K.T.), The Swedish Foundation for International Cooperation in Research and Higher Education STINT (K.T.), and Board of Research at Karolinska Institutet (K.T.). Open access funding provided by Karolinska Institutet.

## **AUTHOR CONTRIBUTIONS**

Conceptualization: A.A., M.B., and K.T.; Methodology: A.A., M.B., and K.T.; Software development: A.A., M.B., and K.T.; Validation: A.A., C.M., I.L. and K.T.; Formal Analysis: A.A., M.B., C.M., M.O., D.L., M.W. and F.M.; Investigation: A.A., M.B. and C.M.; Resources: I.L. and K.T.; Data Curation: A.A., M.B., C.M., M.O., D.L., M.W. and F.M.; Writing – Original Draft: A.A. and K.T.; Writing – Review & Editing: A.A. and K.T.; Visualization:



A.A., M.O., D.L. and K.T.; Supervision: M.A., A.F., C.O.D., I.L. and K.T.; Project Administration: A.A. and K.T.; Funding Acquisition: K.T.

## DECLARATION OF INTERESTS

M.B. is a full-time employee of Bayer AG, Germany.

## REFERENCES

- Anders, S., Reyes, A., and Huber, W. (2012). Detecting differential usage of exons from RNA-seq data. *Genome Res.* 22, 2008–2017. <https://doi.org/10.1101/gr.133744.111>.
- Arora, M., and Austin, C. (2013). Teeth as a biomarker of past chemical exposure. *Curr. Opin. Pediatr.* 25, 261–267. <https://doi.org/10.1097/MOP.0b013e32835e9084>.
- Arora, M., Reichenberg, A., Willfors, C., Austin, C., Gennings, C., Berggren, S., Lichtenstein, P., Anckarsater, H., Tammimies, K., and Bolte, S. (2017). Fetal and postnatal metal dysregulation in autism. *Nat Commun* 8, 15493. <https://doi.org/10.1038/ncomms15493>.
- Austin, C. (2019). Dynamical properties of elemental metabolism distinguish attention deficit hyperactivity disorder from autism spectrum disorder. *Transl Psychiatry* 9. <https://doi.org/10.1038/s41398-019-0567-6>.
- Bai, D., Yip, B.H.K., Windham, G.C., Sourander, A., Francis, R., Yoffe, R., Glasson, E., Mahjani, B., Suominen, A., Leonard, H., et al. (2019). Association of Genetic and Environmental Factors With Autism in a 5-Country Cohort. *JAMA Psychiatry* 76, 1035. <https://doi.org/10.1001/jamapsychiatry.2019.1411>.
- Banerjee-Basu, S., and Packer, A. (2010). SFARI Gene: an evolving database for the autism research community. *Dis. Model. Mech.* 3, 133–135. <https://doi.org/doi:10.1242/dmm.005439>.
- Becker, M., Mastropasqua, F., Reising, J.P., Maier, S., Ho, M.-L., Rabkina, I., Li, D., Neufeld, J., Ballenberger, L., Myers, L., et al. (2020). Presynaptic dysfunction in CASK-related neurodevelopmental disorders. *Transl. Psychiatry* 10, 312. <https://doi.org/10.1038/s41398-020-00994-0>.



Benjamini, Y., and Hochberg, Y. (1995). Controlling the False Discovery Rate: A Practical and Powerful Approach to Multiple Testing. *J. R. Stat. Soc. Ser. B Methodol.* 57, 289–300. <https://doi.org/10.1111/j.2517-6161.1995.tb02031.x>.

Boukhris, T., Sheehy, O., Mottron, L., and Berard, A. (2016). Antidepressant Use During Pregnancy and the Risk of Autism Spectrum Disorder in Children. *JAMA Pediatr* 170, 117–124. <https://doi.org/10.1001/jamapediatrics.2015.3356>.

Caporale, N., Leemans, M., Birgersson, L., Germain, P.-L., Cheroni, C., Borbély, G., Engdahl, E., Lindh, C., Bressan, R.B., Cavallo, F., et al. (2022). From cohorts to molecules: Adverse impacts of endocrine disrupting mixtures. *Science* 375, eabe8244. <https://doi.org/10.1126/science.abe8244>.

Casarotto, P.C., Giryck, M., Fred, S.M., Kovaleva, V., Moliner, R., Enkavi, G., Biojone, C., Cannarozzo, C., Sahu, M.P., Kaurinkoski, K., et al. (2021). Antidepressant drugs act by directly binding to TRKB neurotrophin receptors. *Cell* 184, 1299-1313.e19. <https://doi.org/10.1016/j.cell.2021.01.034>.

Christensen, J., Gronborg, T.K., Sorensen, M.J., Schendel, D., Parner, E.T., Pedersen, L.H., and Vestergaard, M. (2013). Prenatal valproate exposure and risk of autism spectrum disorders and childhood autism. *JAMA* 309, 1696–1703. <https://doi.org/10.1001/jama.2013.2270>.

Courchesne, E., Pramparo, T., Gazestani, V.H., Lombardo, M.V., Pierce, K., and Lewis, N.E. (2019). The ASD Living Biology: from cell proliferation to clinical phenotype. *Mol. Psychiatry* 24, 88–107. <https://doi.org/10.1038/s41380-018-0056-y>.

Curtin, P., Austin, C., Curtin, A., Gennings, C., Arora, M., Tammimies, K., Willfors, C., Berggren, S., Siper, P., Rai, D., et al. (2018). Dynamical features in fetal and postnatal zinc-copper metabolic cycles predict the emergence of autism spectrum disorder. *Sci. Adv.* 4. <https://doi.org/10.1126/sciadv.aat1293>.

David, M.M., Enard, D., Ozturk, A., Daniels, J., Jung, J.-Y., Diaz-Beltran, L., and Wall, Dennis.P. (2016). Comorbid Analysis of Genes Associated with Autism Spectrum Disorders Reveals Differential Evolutionary Constraints. *PLOS ONE* 11, e0157937. <https://doi.org/10.1371/journal.pone.0157937>.

Eising, E., Carrion-Castillo, A., Vino, A., Strand, E.A., Jakielski, K.J., Scerri, T.S., Hildebrand, M.S., Webster, R., Ma, A., Mazoyer, B., et al. (2019). A set of regulatory genes co-expressed in embryonic human brain is implicated in disrupted speech development. *Mol. Psychiatry* 24, 1065–1078. <https://doi.org/10.1038/s41380-018-0020-x>.

Esposito, C.M., Buoli, M., Ciappolino, V., Agostoni, C., and Brambilla, P. (2021). The Role of Cholesterol and Fatty Acids in the Etiology and Diagnosis of Autism Spectrum Disorders. *Int. J. Mol. Sci.* 22, 3550. <https://doi.org/10.3390/ijms22073550>.

Ewels, P.A., Peltzer, A., Fillinger, S., Patel, H., Alneberg, J., Wilm, A., Garcia, M.U., Di Tommaso, P., and Nahnsen, S. (2020). The nf-core framework for community-curated bioinformatics pipelines. *Nat. Biotechnol.* 38, 276–278. <https://doi.org/10.1038/s41587-020-0439-x>.

Eyring, K.W., and Geschwind, D.H. (2021). Three decades of ASD genetics: building a foundation for neurobiological understanding and treatment. *Hum. Mol. Genet.* 30, R236–R244. <https://doi.org/10.1093/hmg/ddab176>.

Falk, A., Koch, P., Kesavan, J., Takashima, Y., Ladewig, J., Alexander, M., Wiskow, O., Taylor, J., Trotter, M., Pollard, S., et al. (2012). Capture of neuroepithelial-like stem cells from pluripotent stem cells provides a versatile system for in vitro production of human neurons. *PloS One* 7, e29597. <https://doi.org/10.1371/journal.pone.0029597>.

Gidlow, D.A. (2015). Lead toxicity. *Occup. Med.* 65, 348–356. <https://doi.org/10.1093/occmed/kqv018>.

Hamilton, J.A., Hillard, C.J., Spector, A.A., and Watkins, P.A. (2007). Brain Uptake and Utilization of Fatty Acids, Lipids and Lipoproteins: Application to Neurological Disorders. *J. Mol. Neurosci.* 33, 2–11. <https://doi.org/10.1007/s12031-007-0060-1>.

Hartwig, A. (1994). Role of DNA repair inhibition in lead- and cadmium-induced genotoxicity: a review. *Environ. Health Perspect.* 102, 6. <https://doi.org/10.1289/ehp.94102s345>.

Heyer, D.B., and Meredith, R.M. (2017). Environmental toxicology: Sensitive periods of development and neurodevelopmental disorders. *Neurotoxicology* 58, 23–41. <https://doi.org/10.1016/j.neuro.2016.10.017>.

Iakoucheva, L.M., Muotri, A.R., and Sebat, J. (2019). Getting to the Cores of Autism. *Cell* 178, 1287–1298. <https://doi.org/10.1016/j.cell.2019.07.037>.

Jannuzzi, A.T., and Alpertunga, B. (2016). Evaluation of DNA damage and DNA repair capacity in occupationally lead-exposed workers. *Toxicol. Ind. Health* 32, 1859–1865. <https://doi.org/10.1177/0748233715590919>.

Jiang, P., Hou, Z., Bolin, J.M., Thomson, J.A., and Stewart, R. (2017). RNA-Seq of Human Neural Progenitor Cells Exposed to Lead (Pb) Reveals Transcriptome Dynamics, Splicing Alterations and Disease Risk Associations. *Toxicol. Sci.* 159, 251–265. <https://doi.org/10.1093/toxsci/kfx129>.

Kim, C.-H., Kim, M.J., Park, J., Kim, J., Kim, J.-Y., An, M.-J., Shin, G.-S., Lee, H.-M., and Kim, J.-W. (2021). Bisphenol A Exposure Changes the Transcriptomic and Proteomic Dynamics of Human Retinoblastoma Y79 Cells. *Genes* 12, 264. <https://doi.org/10.3390/genes12020264>.

Kucera, M., Isserlin, R., Arkhangorodsky, A., and Bader, G.D. (2016). AutoAnnotate: A Cytoscape app for summarizing networks with semantic annotations. <https://doi.org/10.12688/f1000research.9090.1>.

de Leeuw, V.C., Hessel, E.V.S., Pennings, J.L.A., Hodemaekers, H.M., Wackers, P.F.K., van Oostrom, C.T.M., and Piersma, A.H. (2020). Differential effects of fluoxetine and venlafaxine in the neural embryonic stem cell test (ESTn) revealed by a cell lineage map. *NeuroToxicology* 76, 1–9. <https://doi.org/10.1016/j.neuro.2019.09.014>.

Li, D., Choque Olsson, N., Becker, M., Arora, A., Jiao, H., Norgren, N., Jonsson, U., Bölte, S., and Tammimies, K. (2021). Rare variants in the outcome of social skills group training for autism. *Autism Res.* aur.2666. <https://doi.org/10.1002/aur.2666>.

Liao, Y., Wang, J., Jaehnig, E.J., Shi, Z., and Zhang, B. (2019). WebGestalt 2019: gene set analysis toolkit with revamped UIs and APIs. *Nucleic Acids Res.* 47, W199–W205. <https://doi.org/10.1093/nar/gkz401>.

Lin, G.N., Corominas, R., Lemmens, I., Yang, X., Tavernier, J., Hill, D.E., Vidal, M., Sebat, J., and Iakoucheva, L.M. (2015). Spatiotemporal 16p11.2 Protein Network Implicates Cortical

Late Mid-Fetal Brain Development and KCTD13-Cul3-RhoA Pathway in Psychiatric Diseases. *Neuron* 85, 742–754. <https://doi.org/10.1016/j.neuron.2015.01.010>.

Lord, C., Brugha, T.S., Charman, T., Cusack, J., Dumas, G., Frazier, T., Jones, E.J.H., Jones, R.M., Pickles, A., State, M.W., et al. (2020). Autism spectrum disorder. *Nat. Rev. Dis. Primer* 6, 5. <https://doi.org/10.1038/s41572-019-0138-4>.

Love, M.I., Huber, W., and Anders, S. (2014). Moderated estimation of fold change and dispersion for RNA-seq data with DESeq2. *Genome Biol.* 15, 550. <https://doi.org/10.1186/s13059-014-0550-8>.

Luo, Y., Eran, A., Palmer, N., Avillach, P., Levy-Moonshine, A., Szolovits, P., and Kohane, I.S. (2020). A multidimensional precision medicine approach identifies an autism subtype characterized by dyslipidemia. *Nat. Med.* 26, 1375–1379. <https://doi.org/10.1038/s41591-020-1007-0>.

Marini, F., and Binder, H. (2019). pcaExplorer: an R/Bioconductor package for interacting with RNA-seq principal components. *BMC Bioinformatics* 20, 331. <https://doi.org/10.1186/s12859-019-2879-1>.

Markkanen, E., Meyer, U., and Dianov, G. (2016). DNA Damage and Repair in Schizophrenia and Autism: Implications for Cancer Comorbidity and Beyond. *Int. J. Mol. Sci.* 17, 856. <https://doi.org/10.3390/ijms17060856>.

Marques, C., Liu, L., D. Duncan, K., and Lanekoff, I. (2022). A direct infusion probe for rapid metabolomics of low-volume samples (Under Review).

Mastropasqua, F., Oksanen, M., Soldini, C., Alatar, S., Arora, A., Molinari, M., Bellarino, R., Agostini, F., Watts, M., Rabkina, I., et al. (2022). HNRNPU downregulation delays neuronal maturation by altering transcriptional programs and chromatin organization (In Preparation).

Mee, R. (2009). *A Comprehensive Guide to Factorial Two-Level Experimentation* (Springer Science & Business Media).

Merico, D., Isserlin, R., Stueker, O., Emili, A., and Bader, G.D. (2010). Enrichment map: a network-based method for gene-set enrichment visualization and interpretation. *PloS One* 5, e13984. <https://doi.org/10.1371/journal.pone.0013984>.

Miller, J.A., Ding, S.-L., Sunkin, S.M., Smith, K.A., Ng, L., Szafer, A., Ebbert, A., Riley, Z.L., Royall, J.J., Aiona, K., et al. (2014). Transcriptional landscape of the prenatal human brain. *Nature* 508, 199–206. <https://doi.org/10.1038/nature13185>.

Moore, S.J. (2000). A clinical study of 57 children with fetal anticonvulsant syndromes. *J. Med. Genet.* 37, 489–497. <https://doi.org/10.1136/jmg.37.7.489>.

Mossink, B., Negwer, M., Schubert, D., and Nadif Kasri, N. (2021). The emerging role of chromatin remodelers in neurodevelopmental disorders: a developmental perspective. *Cell. Mol. Life Sci.* 78, 2517–2563. <https://doi.org/10.1007/s00018-020-03714-5>.

Nagpal, S., Bakshi, K.D., Kuntal, B.K., and Mande, S.S. (2020). NetConfer: a web application for comparative analysis of multiple biological networks. *BMC Biol.* 18, 53. <https://doi.org/10.1186/s12915-020-00781-9>.

Neal, A.P., and Guilarte, T.R. (2010). Molecular neurobiology of lead (Pb(2+)): effects on synaptic function. *Mol. Neurobiol.* 42, 151–160. <https://doi.org/10.1007/s12035-010-8146-0>.

Pan, S., Tan, Y., Yao, S., Xin, Y., Yang, X., Liu, J., and Xiong, J. (2018). Fluoxetine induces lipid metabolism abnormalities by acting on the liver in patients and mice with depression. *Acta Pharmacol. Sin.* 39, 1463–1472. <https://doi.org/10.1038/aps.2017.207>.

Pintacuda, G., Martín, J.M., and Eggan, K.C. (2021). Mind the translational gap: using iPS cell models to bridge from genetic discoveries to perturbed pathways and therapeutic targets. *Mol. Autism* 12, 10. <https://doi.org/10.1186/s13229-021-00417-x>.

Pluskal, T., Castillo, S., Villar-Briones, A., and Orešič, M. (2010). MZmine 2: Modular framework for processing, visualizing, and analyzing mass spectrometry-based molecular profile data. *BMC Bioinformatics* 11, 395. <https://doi.org/10.1186/1471-2105-11-395>.

R Core Team (2020). R: A language and environment for statistical computing (R Foundation for Statistical Computing, Vienna, Austria.).

Ramosaj, M., Madsen, S., Maillard, V., Scandella, V., Sudria-Lopez, D., Yuizumi, N., Telley, L., and Knobloch, M. (2021). Lipid droplet availability affects neural stem/progenitor cell metabolism and proliferation. *Nat. Commun.* 12, 7362. <https://doi.org/10.1038/s41467-021-27365-7>.

Reimand, J., Isserlin, R., Voisin, V., Kucera, M., Tannus-Lopes, C., Rostamianfar, A., Wadi, L., Meyer, M., Wong, J., Xu, C., et al. (2019). Pathway enrichment analysis and visualization of omics data using g:Profiler, GSEA, Cytoscape and EnrichmentMap. *Nat. Protoc.* *14*, 482–517. <https://doi.org/10.1038/s41596-018-0103-9>.

Sanchez-Martin, F.J., Fan, Y., Lindquist, D.M., Xia, Y., and Puga, A. (2013). Lead induces similar gene expression changes in brains of gestationally exposed adult mice and in neurons differentiated from mouse embryonic stem cells. *PloS One* *8*, e80558. <https://doi.org/10.1371/journal.pone.0080558>.

Satterstrom, F.K., Kosmicki, J.A., Wang, J., Breen, M.S., De Rubeis, S., An, J.-Y., Peng, M., Collins, R., Grove, J., Klei, L., et al. (2020). Large-Scale Exome Sequencing Study Implicates Both Developmental and Functional Changes in the Neurobiology of Autism. *Cell* S0092867419313984. <https://doi.org/10.1016/j.cell.2019.12.036>.

Schindelin, J., Arganda-Carreras, I., Frise, E., Kaynig, V., Longair, M., Pietzsch, T., Preibisch, S., Rueden, C., Saalfeld, S., Schmid, B., et al. (2012). Fiji: an open-source platform for biological-image analysis. *Nat. Methods* *9*, 676–682. <https://doi.org/10.1038/nmeth.2019>.

Senut, M.-C., Cingolani, P., Sen, A., Kruger, A., Shaik, A., Hirsch, H., Suhr, S.T., and Ruden, D. (2012). Epigenetics of early-life lead exposure and effects on brain development. *Epigenomics* *4*, 665–674. <https://doi.org/10.2217/epi.12.58>.

Shannon, P., Markiel, A., Ozier, O., Baliga, N.S., Wang, J.T., Ramage, D., Amin, N., Schwikowski, B., and Ideker, T. (2003). Cytoscape: A Software Environment for Integrated Models of Biomolecular Interaction Networks. *Genome Res.* *13*, 2498–2504. <https://doi.org/10.1101/gr.1239303>.

Stark, Z., Foulger, R.E., Williams, E., Thompson, B.A., Patel, C., Lunke, S., Snow, C., Leong, I.U.S., Puzriakova, A., Daugherty, L.C., et al. (2021). Scaling national and international improvement in virtual gene panel curation via a collaborative approach to discordance resolution. *Am. J. Hum. Genet.* *108*, 1551–1557. <https://doi.org/10.1016/j.ajhg.2021.06.020>.

Stevens, S.A., Nash, K., Koren, G., and Rovet, J. (2013). Autism characteristics in children with fetal alcohol spectrum disorders. *Child Neuropsychol.* *19*, 579–587. <https://doi.org/10.1080/09297049.2012.727791>.

Subramanian, A., Tamayo, P., Mootha, V.K., Mukherjee, S., Ebert, B.L., Gillette, M.A., Paulovich, A., Pomeroy, S.L., Golub, T.R., Lander, E.S., et al. (2005). Gene set enrichment analysis: A knowledge-based approach for interpreting genome-wide expression profiles. *Proc. Natl. Acad. Sci.* *102*, 15545–15550. <https://doi.org/10.1073/pnas.0506580102>.

Thongkorn, S., Kanlayaprasit, S., Jindatip, D., Tencomnao, T., Hu, V.W., and Sarachana, T. (2019). Sex Differences in the Effects of Prenatal Bisphenol A Exposure on Genes Associated with Autism Spectrum Disorder in the Hippocampus. *Sci. Rep.* *9*. <https://doi.org/10.1038/s41598-019-39386-w>.

Thongkorn, S., Kanlayaprasit, S., Panjabud, P., Saeliw, T., Jantheang, T., Kasitipradit, K., Sarobol, S., Jindatip, D., Hu, V.W., Tencomnao, T., et al. (2021). Sex differences in the effects of prenatal bisphenol A exposure on autism-related genes and their relationships with the hippocampus functions. *Sci. Rep.* *11*, 1241. <https://doi.org/10.1038/s41598-020-80390-2>.

Tierney, E., Remaley, A.T., Thurm, A., Jager, L.R., Wassif, C.A., Kratz, L.E., Bailey-Wilson, J.E., Bukelis, I., Sarphare, G., Jung, E.S., et al. (2021). Sterol and lipid analyses identifies hypolipidemia and apolipoprotein disorders in autism associated with adaptive functioning deficits. *Transl. Psychiatry* *11*, 471. <https://doi.org/10.1038/s41398-021-01580-8>.

Tkachev, A., Stekolshchikova, E., Bobrovskiy, D.M., Anikanov, N., Ogurtsova, P., Park, D.I., Horn, A.K.E., Petrova, D., Khrameeva, E., Golub, M.S., et al. (2021). Long-Term Fluoxetine Administration Causes Substantial Lipidome Alteration of the Juvenile Macaque Brain. *Int. J. Mol. Sci.* *22*, 8089. <https://doi.org/10.3390/ijms22158089>.

Uhlin, E., Rönnholm, H., Day, K., Kele, M., Tammimies, K., Bölte, S., and Falk, A. (2017). Derivation of human iPS cell lines from monozygotic twins in defined and xeno free conditions. *Stem Cell Res.* *18*, 22–25. <https://doi.org/10.1016/j.scr.2016.12.006>.

Wickham, H. (2009). *ggplot2* (New York, NY: Springer New York).

Zhao, J., Jung, Y.-H., Jin, Y., Kang, S., Jang, C.-G., and Lee, J. (2019). A comprehensive metabolomics investigation of hippocampus, serum, and feces affected by chronic fluoxetine treatment using the chronic unpredictable mild stress mouse model of depression. *Sci. Rep.* *9*, 7566. <https://doi.org/10.1038/s41598-019-44052-2>.



## METHODS

### RESOURCE TABLE

| REAGENT or RESOURCE                                  | SOURCE            | IDENTIFIER |
|------------------------------------------------------|-------------------|------------|
| <b>Chemicals, Peptides, and Recombinant Proteins</b> |                   |            |
| Lead acetate                                         | Sigma-Aldrich     | 316512     |
| Sodium Valproate                                     | Sigma-Aldrich     | P4543      |
| Bisphenol A                                          | Sigma-Aldrich     | 239658     |
| Zinc phosphate                                       | Sigma-Aldrich     | 587583     |
| Fluoxetine hydrochloride                             | Sigma-Aldrich     | F132       |
| Magnesium chloride                                   | Sigma-Aldrich     | M8266      |
| Copper sulphate                                      | Sigma-Aldrich     | 209198     |
| Ferrous sulphate                                     | Sigma-Aldrich     | 215422     |
| Methanol                                             | Sigma-Aldrich     | 322415     |
| Formic Acid                                          | Sigma-Aldrich     | 00940      |
| DMEM/F-12 Glutamax                                   | Thermo Scientific | 31331-093  |
| Penicillin/ Streptomycin                             | Thermo Scientific | 15140122   |
| Laminin from engelbreth-holm-swarm murine cells      | Sigma-Aldrich     | L2020      |
| B-27 Supplement                                      | Thermo Scientific | 17504044   |
| N-2 Supplement                                       | Thermo Scientific | 17502001   |
| Poly-L-ornithine                                     | Sigma Aldrich     | P3655      |
| Recombinant human EGF                                | Peptotech         | AF-100-15  |
| Recombinant human bFGF                               | Thermo Scientific | 13256-029  |
| Bovine serum albumin                                 | Sigma Aldrich     | A7030      |
| Chelex 100                                           | Bio-Rad           | 1421253    |
| Anti-SOX2 Antibody                                   | Merck-Millipore   | AB5603     |
| <b>Critical Commercial Assays</b>                    |                   |            |
| MTS Assay                                            | Promega           | G3580      |
| BrdU Assay                                           | Abcam             | ab126556   |
| ReliaPrep RNA Miniprep                               | Promega           | Z6012      |

|                                       |                            |                                      |
|---------------------------------------|----------------------------|--------------------------------------|
| R1-Cartridge (RNA)                    | Biopic                     | C105110                              |
| <b>Deposited Data</b>                 |                            |                                      |
| RNA-seq data and analyses source code | GitHub                     | github.com/Tammimies-Lab/FFED-RNASeq |
| <b>Software and Algorithms</b>        |                            |                                      |
| R (v4.1.2)                            | R                          | r-project.org                        |
| DESeq2 (v1.34)                        | Bioconductor               | 10.18129/B9.bioc.DESeq2              |
| Cytoscape (v3.9.0)                    | Cytoscape                  | cytoscape.org                        |
| EnrichmentMap (v3.3.3)                | Cytoscape                  | 10.1371/journal.pone.0013984         |
| GSEA (v4.2.1)                         | Broad Institutet           | 10.1073/pnas.0506580102              |
| AutoAnnotate (v1.3.5)                 | Cytoscape                  | 10.12688/f1000research.9090.1        |
| ggplot2 (v3.3.5)                      | CRAN                       | ggplot2.tidyverse.org                |
| DEXSeq (v1.40)                        | Bioconductor               | 10.18129/B9.bioc.DEXSeq              |
| NetConfer                             | TCS India                  | 10.1186/s12915-020-00781-9           |
| pcaExplorer (v2.20.1)                 | Bioconductor               | 10.18129/B9.bioc.pcaExplorer         |
| WebGestalt (2019)                     | Baylor College of Medicine | webgestalt.org                       |
| MZmine 2                              | OIST Japan                 | github.com/mzmine/mzmine2            |
| Affinity Designer (v1.10.3)           | Serif                      | affinity.serif.com                   |

## LEAD CONTACT AND MATERIALS AVAILILTY

Further information and requests for resources and reagents should be directed to and will be fulfilled by the Lead Contact, Kristiina Tammimies (kristiina.tammimies@ki.se).

## EXPERIMENTAL MODEL AND SUBJECT DETAILS

### Cell culture

For the purpose of this study, previously generated human iPSC lines from tissue samples of a male: CTRL9II – CTRL<sub>Male</sub> (Uhlen et al., 2017) and female: AF22 – CTRL<sub>Female</sub> (Falk et al., 2012) neurotypical donors and two male donors with known genetic variants for NDDs including ASD: ASD12BI – ASD<sub>HNRNPU</sub> (Mastropasqua et al., 2022) and ASD17AII – ASD<sub>CASK</sub> (Becker et al., 2020), were used (Figure 1A). The iPS cells were differentiated into

neuronal progenitor state and maintained as neuroepithelial stem (NES) cells (Uhlen et al., 2017). The NES cells were seeded on tissue culture treated plates (Sarstedt), coated with 20 µg/mL poly-ornithine (Sigma-Aldrich) and 1 µg/mL Laminin2020 (Sigma-Aldrich). These were grown in DMEM/F-12 Glutamax basal medium (Gibco) supplemented with 0.05x B27 (Gibco), 1x N-2 (Gibco), 10 U/ml Penicillin-Streptomycin (Gibco), 10 ng/mL recombinant human bFGF (Gibco) and 10 ng/mL recombinant human EGF (Peprotech). For undirected differentiation of NES cells to neuronal cell population was achieved by the withdrawal of growth factors from the culture medium (Uhlen et al., 2017). The NES cells were seeded on tissue culture treated plates (Sarstedt), coated with 20 µg/mL poly-ornithine (Sigma-Aldrich) and 1 µg/mL Laminin2020 (Sigma-Aldrich). These were grown in DMEM/F-12 Glutamax basal medium (Gibco) supplemented with 0.5x B27 (Gibco), 1x N-2 (Gibco) and 10 U/ml Penicillin-Streptomycin (Gibco). The cells were differentiated for 5 days post induction of differentiation, followed by sampling based on the downstream application.

## METHOD DETAILS

### Cytotoxicity assays for environmental factors

We evaluated the cytotoxicity of lead (Pb), valproic acid (VPA), bisphenol A (BPA), ethanol (EtOH), fluoxetine hydrochloride (FH) and zinc deficiency (Zn-) in our cell lines. The treatment concentration ranges (0.00 – 30.00 µM or 0.00 – 200.00 mM) for the selected environmental factors were determined based on those previously reported in different cell types and tissue samples from the literature. (Table S1), followed by testing in our cell lines using the MTS cytotoxicity assay (Promega).

The NES cells were exposed to a concentration range of the environmental factor being studied. Growth factors were withdrawn from the cell culture, to initiate differentiation. The exposure media was changed every second day. At 24- and 120-hours post exposure, the cells were treated with MTS (3-(4,5-dimethylthiazol-2-yl)-5-(3-carboxymethoxyphenyl)-2-(4-sulfophenyl)-2H-tetrazolium) reagent, based on instructions from the manufacturer. After 3 hours of incubation at 37°C and 5% CO<sub>2</sub>, absorbance was recorded at 490 nm using a spectrophotometric microplate reader.

### Immunocytochemistry

The stem cell specific marker, SOX2 was visualised using immunocytochemistry. Cells were cultured on glass coverslips for 120 hours and fixed for 20 minutes in 4% paraformaldehyde.

The primary antibody used was SOX2-AB5603, 1:1000 (Merck-Millipore). All images were taken with LSM 700 Zeiss Confocal Microscope (Zeiss Plan-Apochromat 63×/1.40na Oil DIC Objective M27), with 63× magnification at 1024- × 1024- pixel (pxl) resolution, resulting in an aspect ratio of 0.099233 µm per pixel. Fiji – ImageJ (Schindelin et al., 2012) was used to estimate SOX2 positivity, normalised against total cellular nuclei. Quantification of percentage positivity was done in R (v4.1.2) (R Core Team, 2020).

### **Cell proliferation**

To analyse differences in cellular proliferation, when exposed to the environmental factors, the BrdU assay (Abcam) was performed at 24 hours and 120 hours post induction of differentiation. 24 hours prior to the read-out, 1X-BrdU reagent was added to the cell culture vessels for incorporation by incubation at 37°C and 5% CO<sub>2</sub>. For the read-out, the culture media was aspirated, and cells were fixed with the supplied fixing solution. This was followed by exposure to the anti-BrdU antibody (primary antibody), followed by incubation at room temperature for 1 hour and washing with the supplied plate wash buffer. The cells were incubated with the HRP-tagged secondary antibody at room temperature for 30 minutes followed by TMB exposure and recording absorbance at 450 nm. Quantification of percentage proliferation was done in R (v4.1.2) (R Core Team, 2020).

### **Fractional factorial experimental design (FFED)**

Based on our aim to study six exposures, we chose the L8 Orthogonal Array based FFED. The cell culture media was spiked with the experimental factors as per the FFED and pre-determined treatment concentration, to mimic sustained low-grade exposure.

### **Bulk RNA sequencing (RNA-seq)**

Cell lysates were collected on day 5 of exposure (N=43). At least one biological replicate was included for each of the four cell lines (n=32). An additional full biological replicate was collected for CTRL9II (n=8) and a partial for AF22 (n=4) to account for cell culture related effects. RNA samples were extracted using a spin-column based kit (Promega) and following manufacturer's instructions. RNA integrity was determined using a fluorescence based micro-capillary detection system (Qsep100, Bioptic) using an RNA specific kit (Bioptic) and following manufacturer's guidelines.

Library preparation and sequencing were performed at the National Genomic Infrastructure (NGI), Stockholm. The sequencing library was prepared using the Illumina

TruSeq RNA RiboZero GOLD kit. Pooling and sequencing were done on NovaSeq6000 (NovaSeq Control Software 1.6.0/RTA v3.4.4) with a 2x151 setup using 'NovaSeqXp' workflow in 'S4' mode flowcell. The Bcl to FastQ conversion was performed using bcl2fastq (v2.20.0.422) from the CASAVA software suite. Results from the best practice bioinformatics nf-core/RNAseq pipeline of the NGI, were used for further analysis (Ewels et al., 2020). In short, quality control of read sequences was performed with FastQC, followed by preparation for alignment using UMI-tools (extraction of unique molecular identifiers), Trim Galore! (adapter and quality trimming), BBSplit (removal of genomic contaminants) and SortMeRNA (removal of ribosomal RNA). Read alignment was completed using STAR aligner. Differential gene expression (DGE) analysis was performed using the DESeq2 package (v3.14) (Love et al., 2014) in R (v4.1.2) (R Core Team, 2020).

The analysis for the detection of differentially expressed genes (DEGs) was stratified depending on several levels of complexity. In the *Level I – Global Effects*, comparisons across all cell lines, independent of genetic background were made and DEGs and globally effected pathways were identified. *Level II – Clinical Background Effects*, comparisons based on the clinical background of the iPSC lines were made to identify DEGs. Here, the neurotypical male and female iPSC lines belonged to the non-ASD group, while the male ASD iPSC lines belong to the ASD group. At *Level III – Cell Line Effects*, comparisons were made between the control and treatment groups of each individual cell line included in the study. Here, the model used was  $design = \sim condition$ , followed by filtering based on the chosen criteria. Lastly, *Level IV – Interaction Effects*, were analysed where comparisons were made across all cell lines, both independent as well as dependent on clinical background, for the three possible interactions as per the FFED. This included interactions between Pb and Zn, VPA and FH, and BPA and EtOH. The model used was  $design = \sim CellLine + Replicate + envint + CellLine*envint$ . Based on instructions provided by the package developer, the PCA was performed and were exported for easy visualisation using the pcaExplorer package (v2.20.1) (Marini and Binder, 2019) in R (v4.1.2) (R Core Team, 2020).

## Pathway enrichment

Pathway analysis was done according to previously described protocols (Reimand et al., 2019). Following DGE analysis, RNK files were generated, and Gene-Set Enrichment Analysis (GSEA, v4.2.1) (Subramanian et al., 2005) was performed for biological processes, molecular function, and cellular components, with a significance threshold of  $FDR < 0.05$ . The scored gene ontology information (biological processes) was imported into Cytoscape (v3.9.0) (Shannon et

al., 2003) and visualised using the EnrichmentMap (v3.3.3) (Merico et al., 2010) app. The generated clusters were subsequently labelled using the AutoAnnotate (v1.3.5) (Kucera et al., 2016) app, to identify enriched pathways, that were both differentially upregulated and downregulated. Summary networks were also created following the annotation. The generated network(s) were exported as PDFs and aesthetically organised using Affinity Designer (v1.10.4).

Network parameters for the generated gene ontology biological processes (GOBP) networks were analysed using the online tool NetConfer (Nagpal et al., 2020). With the “WF1: Assess similarity of network components” workflow, lists were generated to indicate unique and shared GOBP terms across the compared networks. The “WF2: Identify and compare key nodes” workflow was used to compute global network properties including total nodes, total edges, diameter, density, clustering coefficient and average degree.

## Gene enrichment

We used the publicly available BrainSpan (Miller et al., 2014) RNA-sequencing dataset that contains spatio-temporal gene expression data pertaining to typical neurodevelopment to analyse the enrichment of DEGs in certain time and regions. After removing low quality samples (RIN < 9.0) from the dataset, and genes with low expression (< 1 FPKM in at least 2 samples) and with low variable expression between samples (> 0 FPKM less than 50% of samples and coefficient of variance < 0.25) (Eising et al., 2019), a total of 344 samples and 24434 genes were screened for further analysis. Four brain regions and eight developmental periods from 8 PCW (weeks post conception) to 40 years of age, were defined (Lin et al., 2015). Hierarchical clustering was performed to group significant gene lists to 2 clusters separately, based on their standardized mean expression pattern across all brain regions and timepoints. To identify if there were any significantly enriched gene clusters in any brain regions or time periods, the mean expression of random genes with similar numbers of selected cluster at each region and time period were calculated. The p value was based on the proportion of selected gene clusters' mean expression that were higher than the random genes' mean expression after 10,000 times of permutation. FDR (Benjamini and Hochberg, 1995) was used to adjust p values for multiple comparisons and were reported.

To examine for enrichment of the significant DEGs following exposure to the environment risk factors in publicly available ASD and NDD related gene lists, genetic data was obtained from SFARI gene (v2021 Q3) (Banerjee-Basu and Packer, 2010), Genetic epilepsy syndromes (EPI) (v2.489) panel (Stark et al., 2021), Intellectual disability (v3.1500)

(ID) panel (Stark et al., 2021) and a developmental gene list (Li et al., 2021). Enrichment analysis based on hypergeometric testing was performed using the `hyper` function in R (R Core Team, 2020). The background gene list for the analysis was generated from the RNA-seq expression data, for expressed genes with a base mean >20.

### Differential exon usage

Differential exon usage (DEU) analyses were performed using DEXSeq package (v1.36.0) (Anders et al., 2012). Flattened annotation file was created using provided python script excluding the aggregate exon bins and exon counts were calculated using provided python script. For the global effects (*Level I*) analysis, the cell line factor was used as a blocking factor using *formulaFullModel* =  $\sim sample + exon + CellLine:exon + condition:exon$  and *formulaReducedModel* =  $\sim sample + exon + CellLine:exon$ . Therefore, DEU exon bins were called based on differences after treatments and differences between cell line gene expression backgrounds was blocked from the analysis. The analysis was repeated for ASD (ASD<sub>CASK</sub>, ASD<sub>HNRNPU</sub>) and non-ASD cell lines (CTRL<sub>Male</sub>, CTRL<sub>Female</sub>) again blocking gene expression backgrounds between cell lines. Finally, the analysis was performed for all the cell lines separately per treatment by  $\sim sample + exon + condition:exon$ . A gene was called to have evidence for DEU, if it had at least one exon bin differentially used between conditions. The difference was considered significant with FDR (Benjamini and Hochberg, 1995) adjusted  $P < 0.05$ , exon base mean  $\geq 10$  and an absolute log fold change  $\geq 1.5$ . Over-representation analysis (ORA) was performed using the online tool WebGestalt (Liao et al., 2019).

### Direct infusion electrospray ionisation mass spectrometry (ESI-MS)

Metabolomic profiling was performed using the direct infusion probe (DIP) for ESI-MS (Marques et al., 2022) on snap-frozen cell lysates (N=24) at day 5 of exposure to 3.0  $\mu$ M FH, with relevant controls. The cells were stored as pellets in -80 freezer prior to lysing with the electrospray solvent containing 9:1 methanol:water and 0.1% formic acid. To enable comparison, all cell samples had the similar number of cells per volume. The samples were analysed on a QExactive Orbitrap instrument at 140,000 mass resolving power using full scanning between 70 and 1000 Da in untargeted mode. The resulting data was extracted using one minute data per sample and sorted in MZmine2 (Pluskal et al., 2010). Quantification was performed using a one-point calibration and the metabolite concentration in the sample was



calculated from the concentration of the corresponding internal standard multiplied with the intensity ratio of the endogenous metabolite and the internal standard.

To test for significance of the resulting metabolite concentrations ( $\mu\text{M}$ ) following the mass spectrometry analysis pipeline, a linear model was applied to first the complete dataset, then to subset datasets based on the clinical background groups and individual cell lines. Here, the model used was  $lm(\text{concentration} \sim \text{exposure})$ , followed by filtering based on the level of analyses: global effects, clinical background effects, and cell line effects. The obtained p values were adjusted for multiple comparisons using the FDR method in R (v4.1.2) (R Core Team, 2020). Significantly modulated metabolites (Untreated vs. Treated) were selected based on a significance threshold of adjusted  $p < 0.05$  and were visualised using the `ggplot2` package (v3.3.5) (Wickham, 2009) in R (v4.1.2) (R Core Team, 2020).

## QUANTIFICATION AND STATISTICAL ANALYSIS

All statistical analyses were performed in R (v4.1.2). The statistical models and tests used for the analyses are described in the methodology relevant to the experimental technique, in the sections above.

## DATA AND CODE AVAILABILITY

The generated data and utilised code is available on GitHub (<https://github.com/Tammimies-Lab/FFED-RNASeq>) or available upon reasonable request from the corresponding author ([kristiina.tammimies@ki.se](mailto:kristiina.tammimies@ki.se)).

## FIGURE LEGENDS

### Main Figures

#### Figure 1. Overview of study plan using fractional factorial experiment design (FFED)

(A) Exposure of neuroepithelial stem (NES) cells derived from human induced pluripotent stem cells (iPSCs) during neuronal differentiation for 120 hours. Four cell lines, neurotypical controls ( $\text{CTRL}_{\text{Male}}$ ,  $\text{CTRL}_{\text{Female}}$ ) and males with autism spectrum disorder (ASD) diagnoses ( $\text{ASD}_{\text{CASK}}$ : *CASK* splice site variant,  $\text{ASD}_{\text{HNRNPU}}$ : *HNRNPU* deletion), were exposed to six

environmental factors during differentiation, namely lead (Pb), fluoxetine hydrochloride (FH), ethanol (EtOH), valproic acid (VPA), bisphenol A (BPA) and zinc deficiency (Zn-).

(B) Using RNA samples from (A), RNA-sequencing was performed followed by differential gene expression analysis for global effects, clinical background effects, cell line effects and interaction effects. Using this, pathway enrichment and network visualisation was done.

(C) Enriched pathways identified from (B) following FH exposure were detected using direct infusion electrospray ionisation mass spectrometry (ESI-MS) and quantified across the different levels of analyses.

## **Figure 2. Differential gene expression and pathway enrichment – *Level I* analysis of global effects following environmental factor exposure**

(A) Heatmap of significant (adj.  $p < 0.05$ ) differentially expressed genes following Pb exposure for 5 days.

(B) Gene Ontology (GO) enrichment analysis with top 10 upregulated and downregulated biological processes following Pb exposure for 5 days.

(C) Heatmap of significant (adj.  $p < 0.05$ ) differentially expressed genes following FH exposure for 5 days.

(D) GO enrichment analysis with top 10 upregulated and downregulated biological processes following FH exposure for 5 days.

(E) Summary network of upregulated and downregulated clusters enriched for day 5 exposure of lead (Pb), fluoxetine hydrochloride (FH), ethanol (EtOH), valproic acid (VPA), bisphenol A (BPA) and zinc deficiency (Zn-).

## **Figure 3. Summary networks from pathway enrichment – *Level III* analysis of cell line effects following lead (Pb) and fluoxetine (FH) exposure**

(A) Upregulated and (B) downregulated clusters enriched for day 5 exposure of Pb in CTRL<sub>Male</sub>, CTRL<sub>Female</sub>, ASD<sub>HNRNPU</sub> and ASD<sub>CASK</sub>.

(C) Upregulated and (D) downregulated clusters enriched for day 5 exposure of FH in CTRL<sub>Male</sub>, CTRL<sub>Female</sub>, ASD<sub>HNRNPU</sub> and ASD<sub>CASK</sub>.

## **Figure 4. Metabolic changes induced by fluoxetine (FH) exposure**

(A) Significantly enriched metabolites (adj.  $p < 0.05$ ) from day 5 FH exposure for global effects (*Level I* analysis).

(B) Significantly enriched (adj.  $p < 0.05$ ) and unique metabolites from day 5 FH exposure, in the non-ASD (*Level II* analysis).

(C) Significantly enriched (adj.  $p < 0.05$ ) and unique metabolites from day 5 FH exposure, in the ASD group (*Level II* analysis).

(D) Significantly enriched (adj.  $p < 0.05$ ) and common metabolites from day 5 FH exposure, in the non-ASD and ASD groups (*Level II* analysis).

## Supplementary Figures

### Figure S1. Cellular effects of environmental factors on early developing neurons

(A) Estimation of cell viability following exposure of lead (Pb), valproic acid (VPA), bisphenol A (BPA), fluoxetine (FH) and ethanol (EtOH) for 24 and 120 hours on undirected differentiation of CTRL<sub>Male</sub> using the MTS cytotoxicity assay.

(B) Estimation of cell viability for selected concentrations (from A) of Pb, VPA, BPA, EtOH, FH, and zinc deficiency (Zn-) for 24 and 120 hours on undirected differentiation of CTRL<sub>Male</sub> using the fractional factorial experiment design (FFED) and MTS cytotoxicity assay (Tukey post hoc  $p < 0.05$ ,  $** < 0.01$ ,  $*** < 0.001$ ).

(C) SOX2 positivity of selected concentrations (from A) of Pb, VPA, BPA, EtOH, FH and Zn- for 120 hours on undirected differentiation of CTRL<sub>Male</sub> and ASD<sub>CASK</sub>.

(D) Changes in cellular proliferation for selected concentrations (from A) of Pb, VPA, BPA, EtOH, FH, and Zn- at 120 hours of undirected differentiation of CTRL<sub>Male</sub>, CTRL<sub>Female</sub>, ASD<sub>CASK</sub> and ASD<sub>HNRNPU</sub> using the BrdU assay (Tukey post hoc  $p < 0.001$ ).

### Figure S2. Differential expression and gene enrichment for lead (Pb) and fluoxetine (FH)

(A) Principal component analysis (PCA) scatter plot of non-ASD and ASD cell lines exposed to Pb for 120 hours.

(D) PCA scatter plot of non-ASD and ASD cell lines exposed to FH for 120 hours.

(C) Cluster dendrogram and developmental period trajectory of significant differentially expressed genes (DEGs) following Pb exposure for 5 days, in the Brainspan dataset.

(D) Enrichment dot plot of significant DEGs following Pb exposure for 5 days, in the Brainspan dataset across four brain regions (Frontal Cortex, Temporo-parietal Cortex, Sensorimotor Cortex, and Subcortical Regions) for developmental periods (P1: Early foetal  $\leq 12$  weeks, P2: Early mid-foetal 13-18 weeks, P3: Late mid-foetal 19-24 weeks, P4: Late foetal 25-38 weeks,

P5: Infancy 18 months, P6: Childhood 19 months-11 years, P7: Adolescence 12-19 years, P8: Adulthood 20-60+ years).

(E) Cluster dendrogram and developmental period trajectory of significant DEGs following FH exposure for 5 days, in the Brainspan dataset.

(F) Enrichment dot plot of significant DEGs following FH exposure for 5 days, in the Brainspan dataset across four brain regions (Frontal Cortex, Temporo-parietal Cortex, Sensorimotor Cortex, and Subcortical Regions) for developmental periods (P1: Early foetal  $\leq 12$  weeks, P2: Early mid-foetal 13-18 weeks, P3: Late mid-foetal 19-24 weeks, P4: Late foetal 25-38 weeks, P5: Infancy 18 months, P6: Childhood 19 months-11 years, P7: Adolescence 12-19 years, P8: Adulthood 20-60+ years).

### **Figure S3. Summary networks and differential exon usage (DEU) of selected environmental factors in early developing neurons**

(A) Upregulated clusters in the non-ASD group (*Level II* analysis).

(B) Upregulated clusters for two-way interactions in CTRL<sub>Male</sub> (*Level IV* analysis).

(C) Downregulated clusters in the non-ASD group (*Level II* analysis).

(D) Downregulated clusters in the ASD group (*Level II* analysis).

(E) Downregulated clusters for two-way interactions in CTRL<sub>Male</sub> (*Level IV* analysis).

(F) Upregulated clusters in the ASD group (*Level II* analysis).

(G) Gene ontology biological processes (GOBP) enrichment terms of significant DEU genes (adj.  $p < 0.05$ ) following bisphenol A (BPA) exposure in CTRL<sub>Female</sub> (*Level III* analysis).

### **Figure S4. Mass spectrometry-based metabolomics of fluoxetine (FH) exposure**

(A) Concentration heatmap of selected metabolites following FH exposure for 5 days in the non-ASD group.

(B) Concentration heatmap of selected metabolites following FH exposure for 5 days in the ASD group.

**A**

bioRxiv preprint doi: <https://doi.org/10.1101/2022.06.27.497311>; this version posted June 28, 2022. The copyright holder for this preprint (which was not certified by peer review) is the author/funder, who has granted bioRxiv a license to display the preprint in perpetuity. It is made available under aCC-BY-ND 4.0 International license.

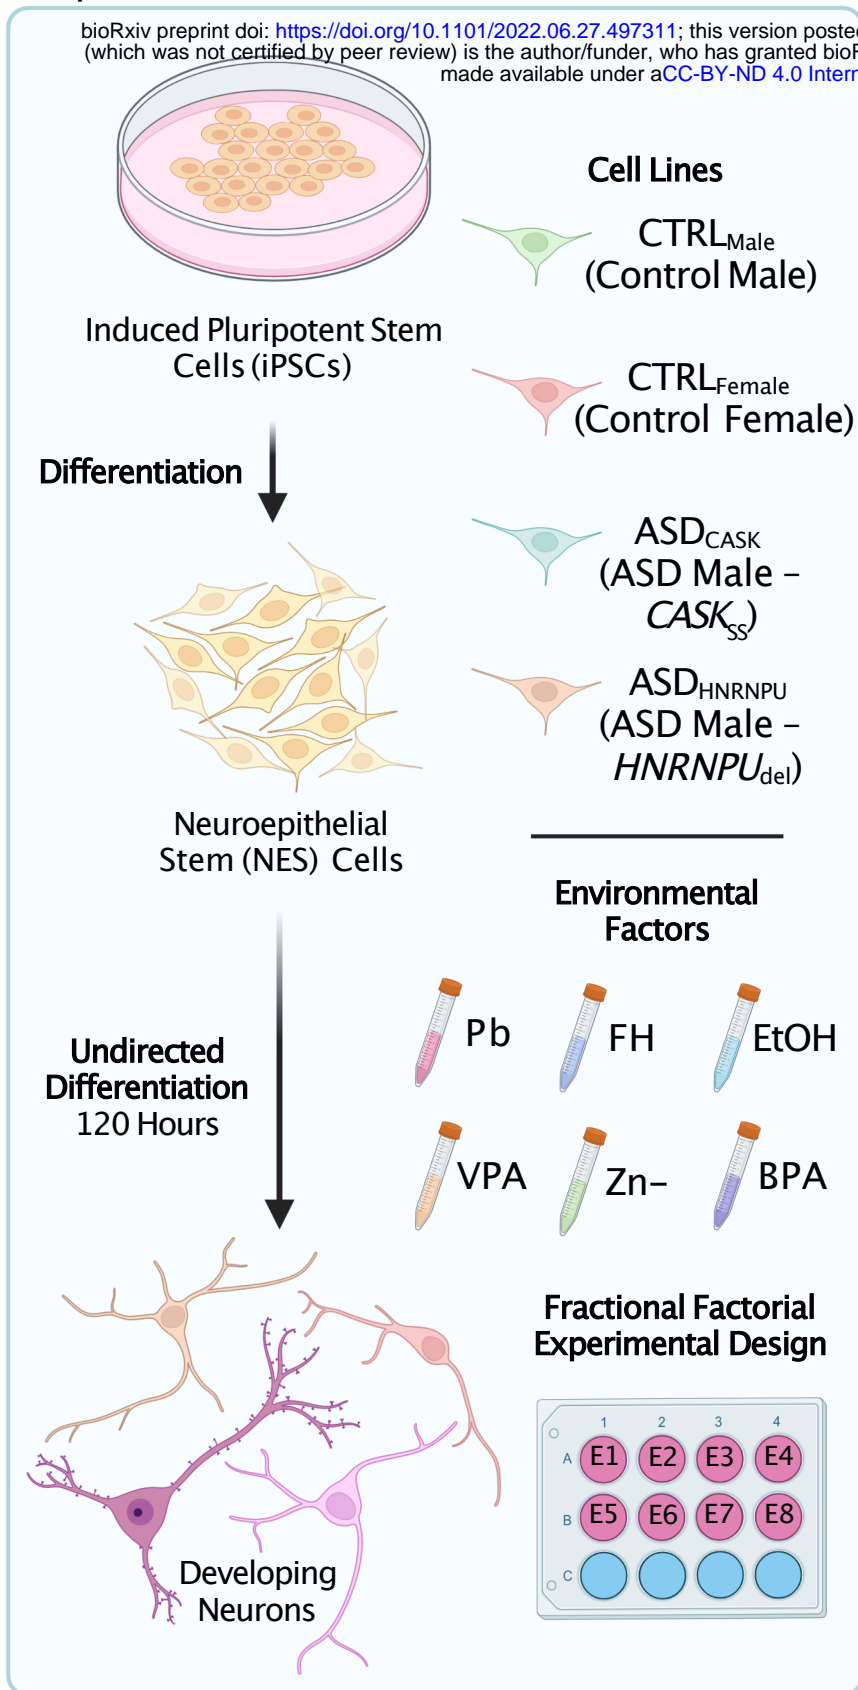

## B

## Transcriptomic Enrichment

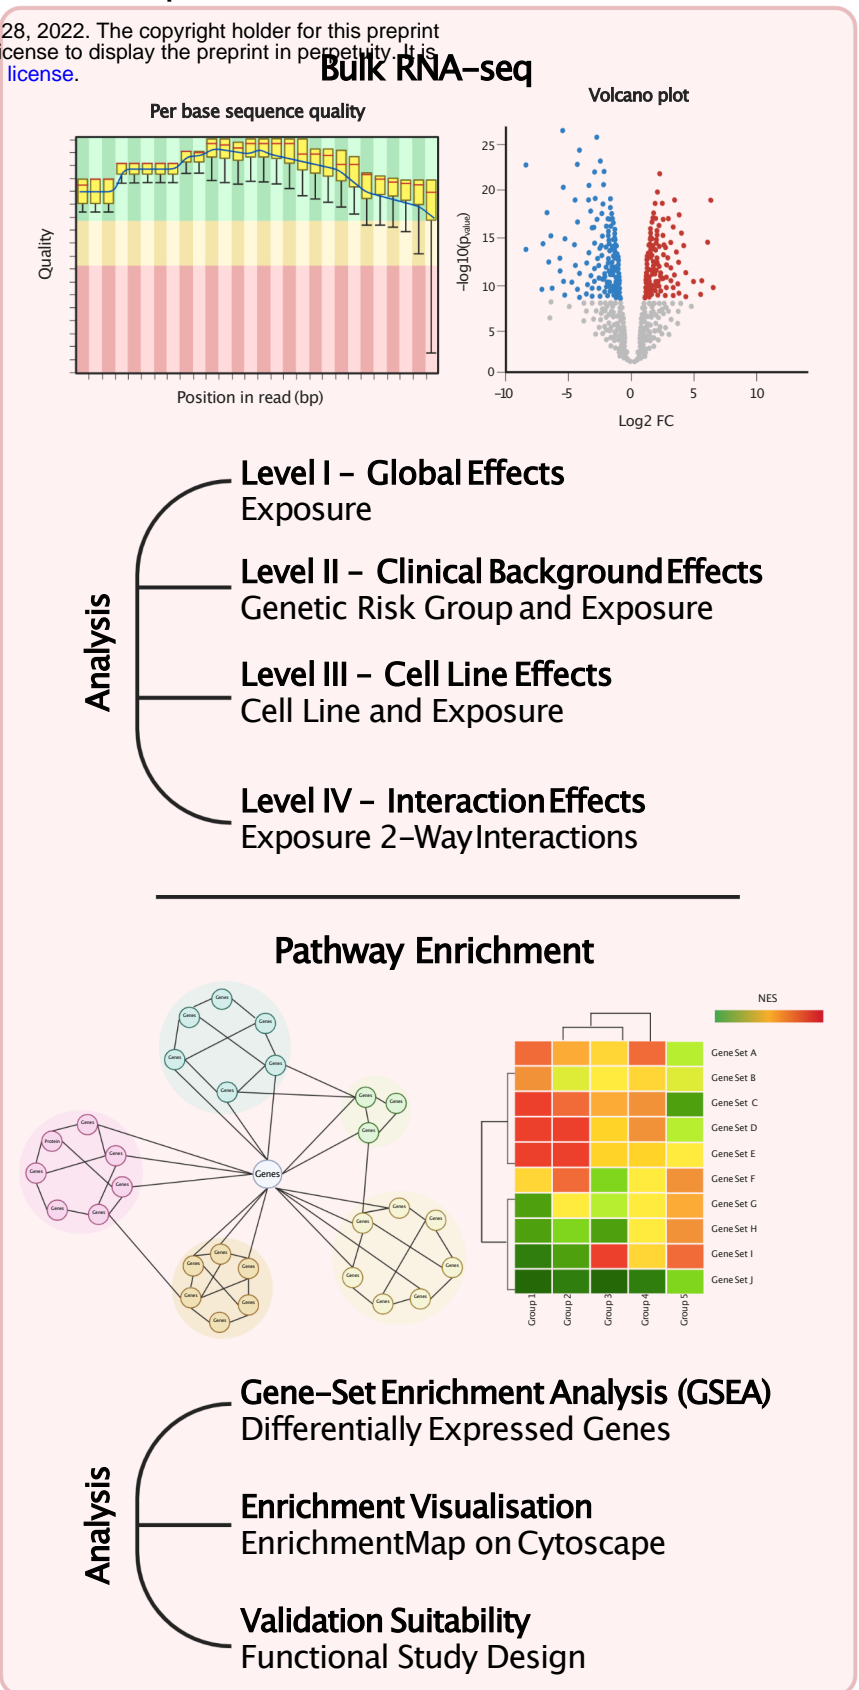

## C

## Validation

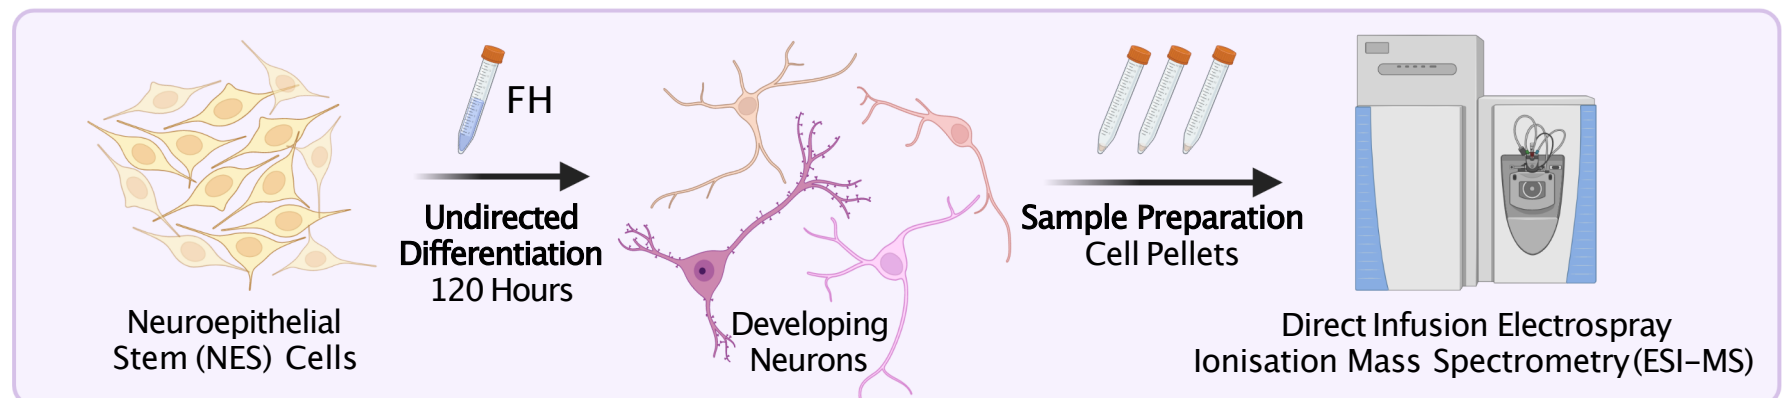

### Figure 1

**A** Pb – expression heatmap (Level I)

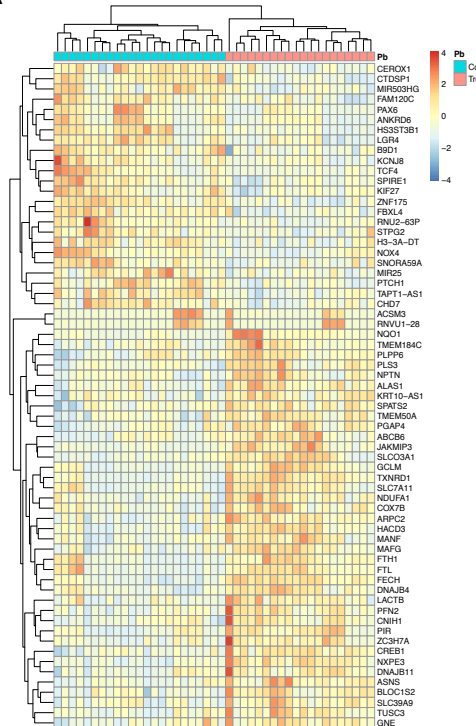

**B** Pb – pathway enrichment (Level I)

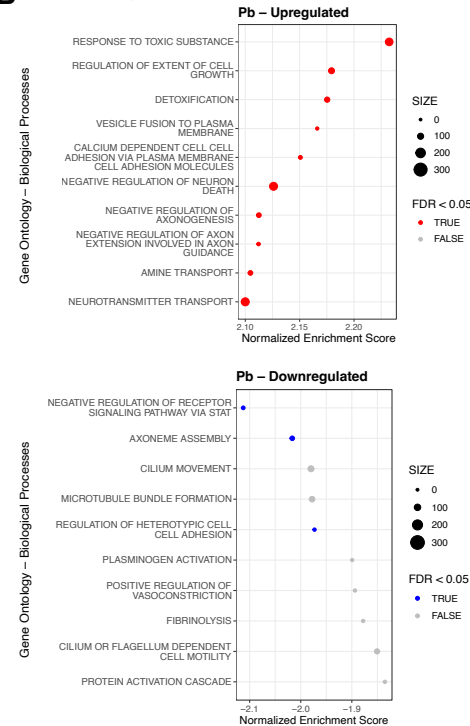

**C** FH – expression heatmap (Level I)

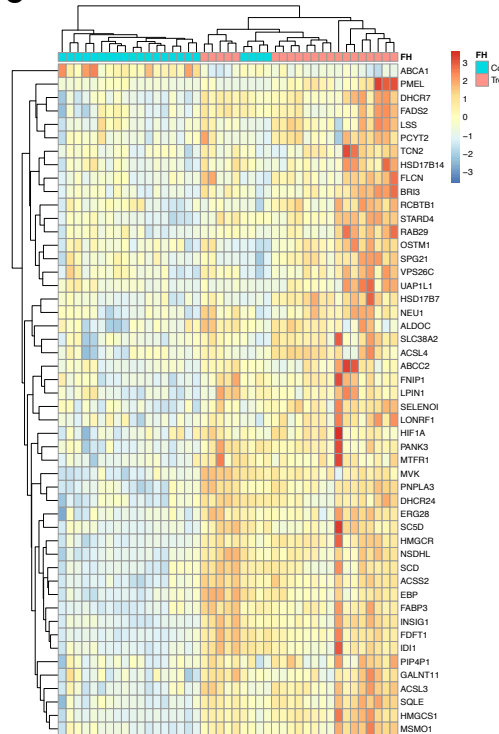

**D** FH – pathway enrichment (Level I)

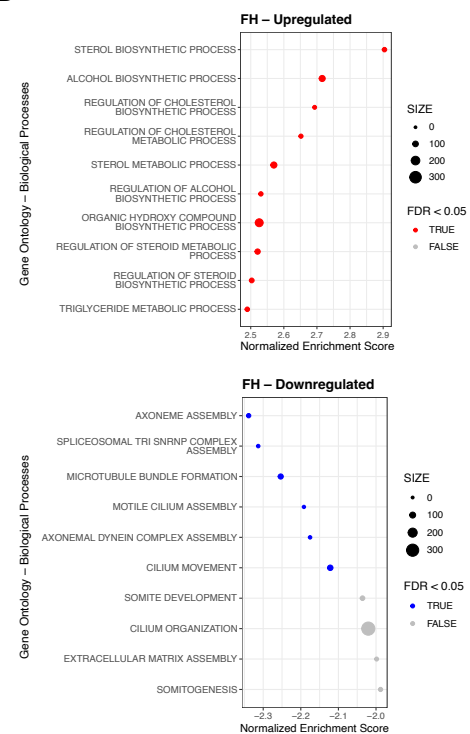

**E** Summary network analysis

**Level I – Upregulated**

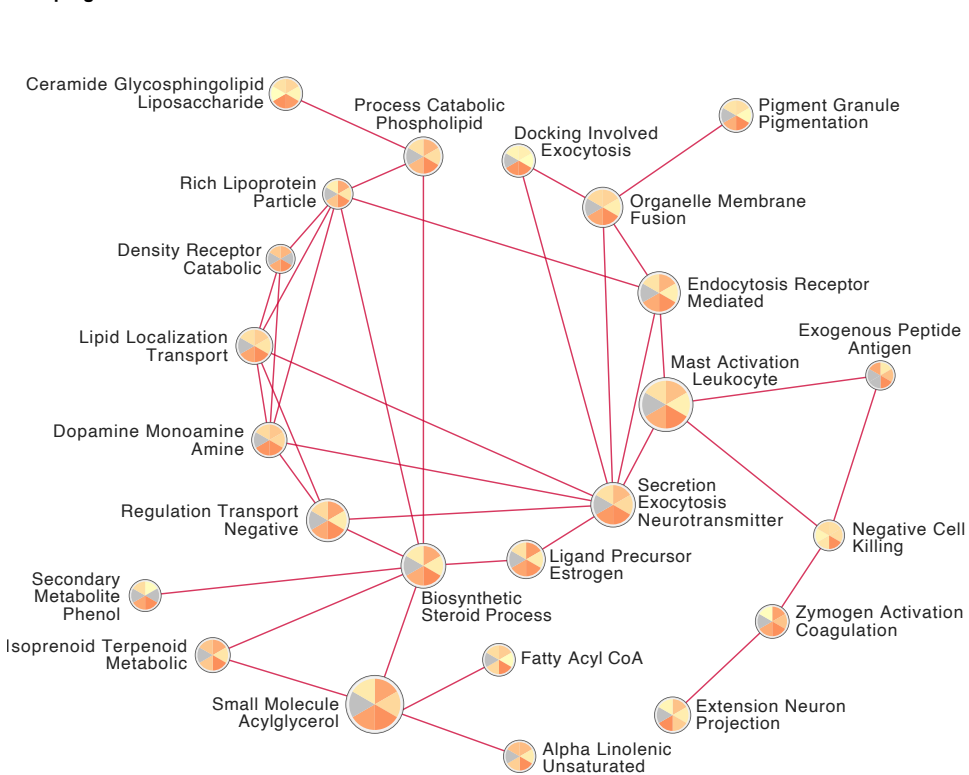

**Level I – Upregulated (Singleton Nodes)**

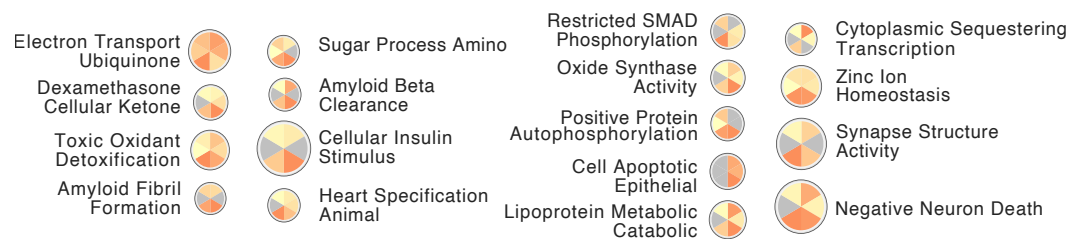

**Level I – Downregulated (Singleton Nodes)**

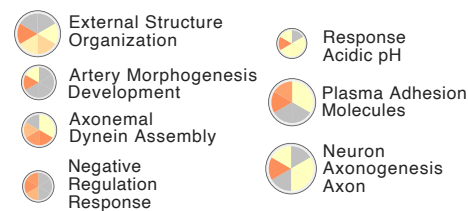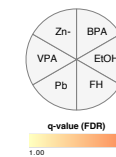

**Figure 2**



**A** Summary network analysis  
*Level III – Pb, Upregulated*

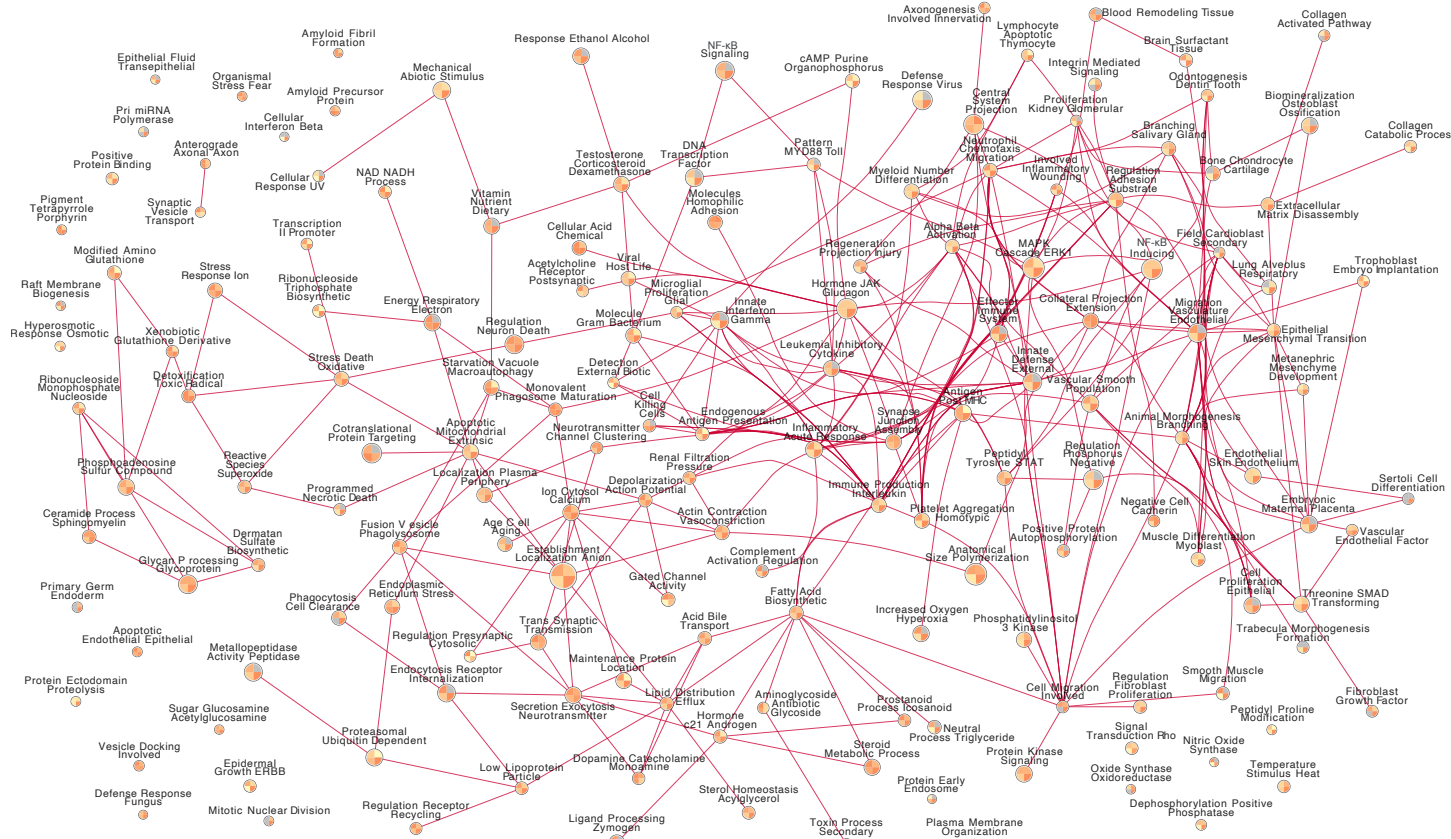

**B** Summary network analysis  
*Level III – Pb, Downregulated*

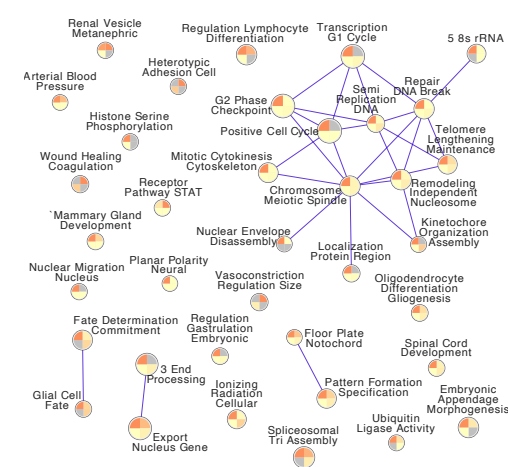

**C** Summary network analysis  
*Level III – FH, Upregulated*

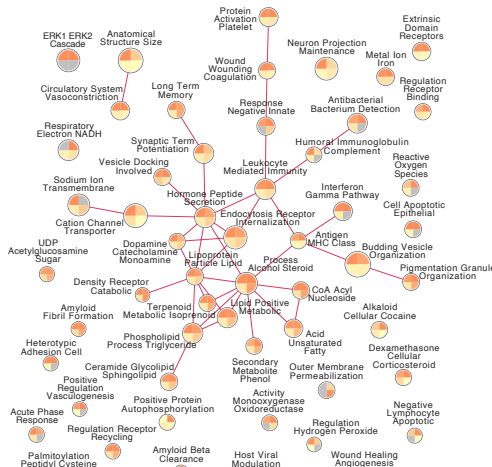

**D** Summary network analysis  
*Level III – FH, Downregulated*

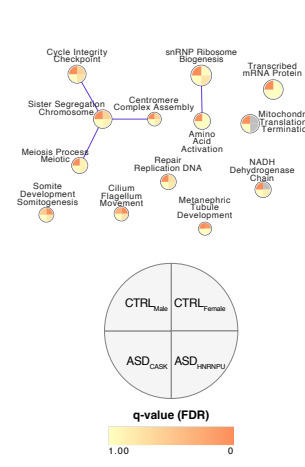

### Figure 3



**A** Global (*Level I*) metabolite profile (adj.  $p < 0.05$ )

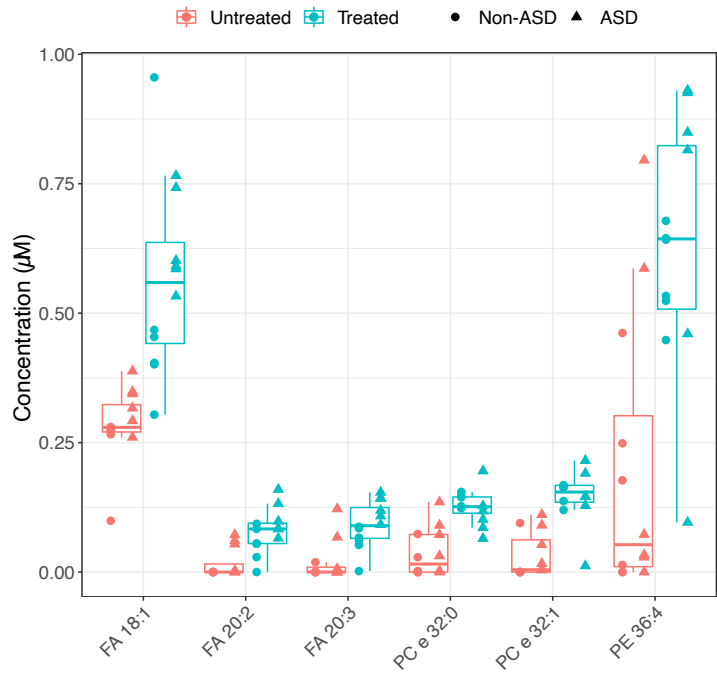

**B** Non-ASD (*Level II*) metabolite profile (adj.  $p < 0.05$ )

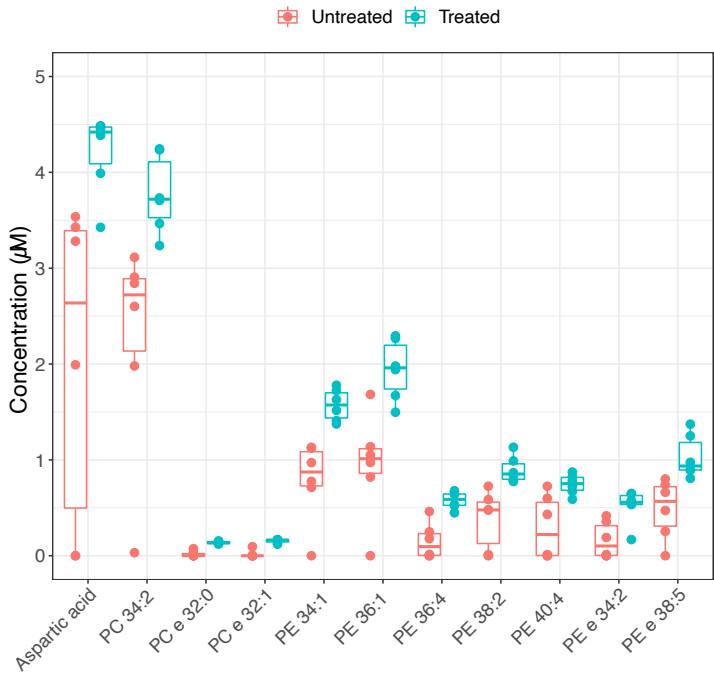

**C** ASD (*Level II*) metabolite profile (adj.  $p < 0.05$ )

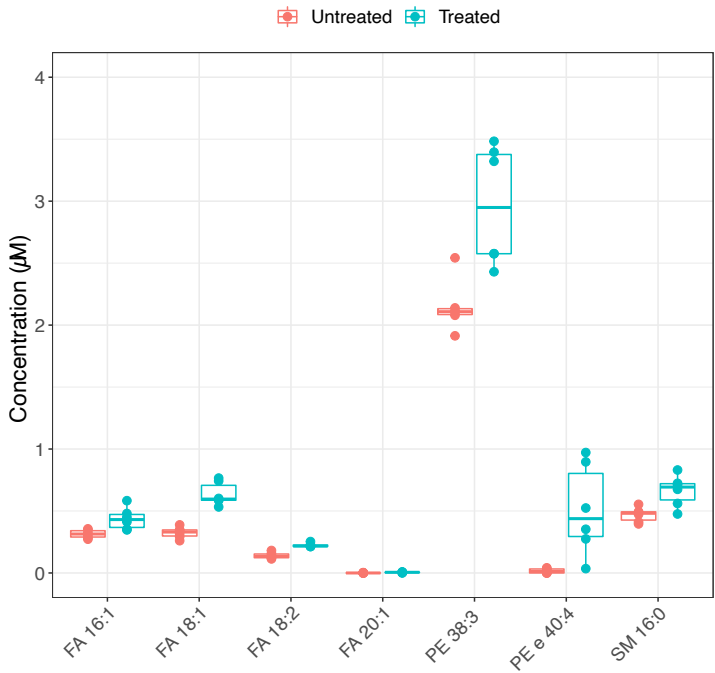

**D** Shared Non-ASD and ASD (*Level II*) metabolite profile (adj.  $p < 0.05$ )

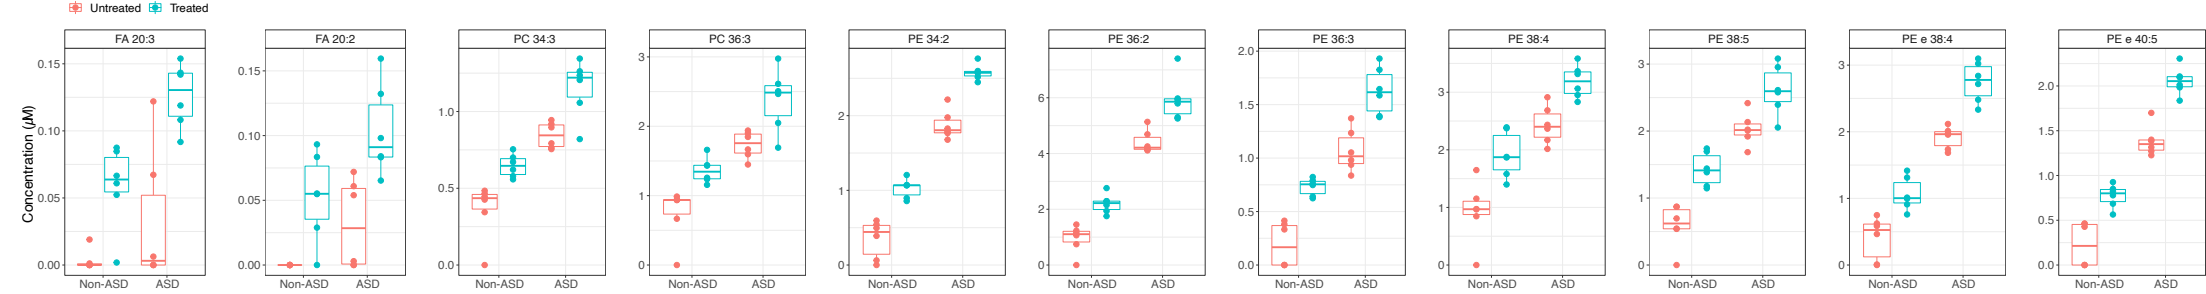

**Figure 4**

**A** Cytotoxicity assay – independent factors

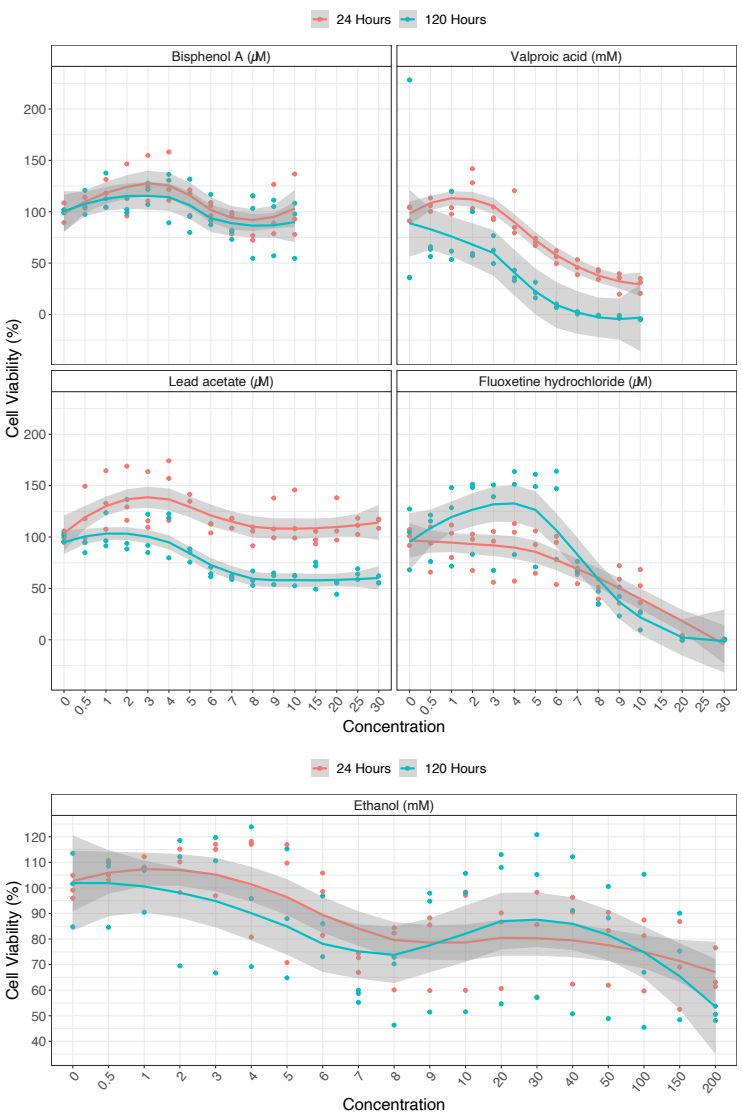

**B** Cytotoxicity assay – fractional factorial experiment design

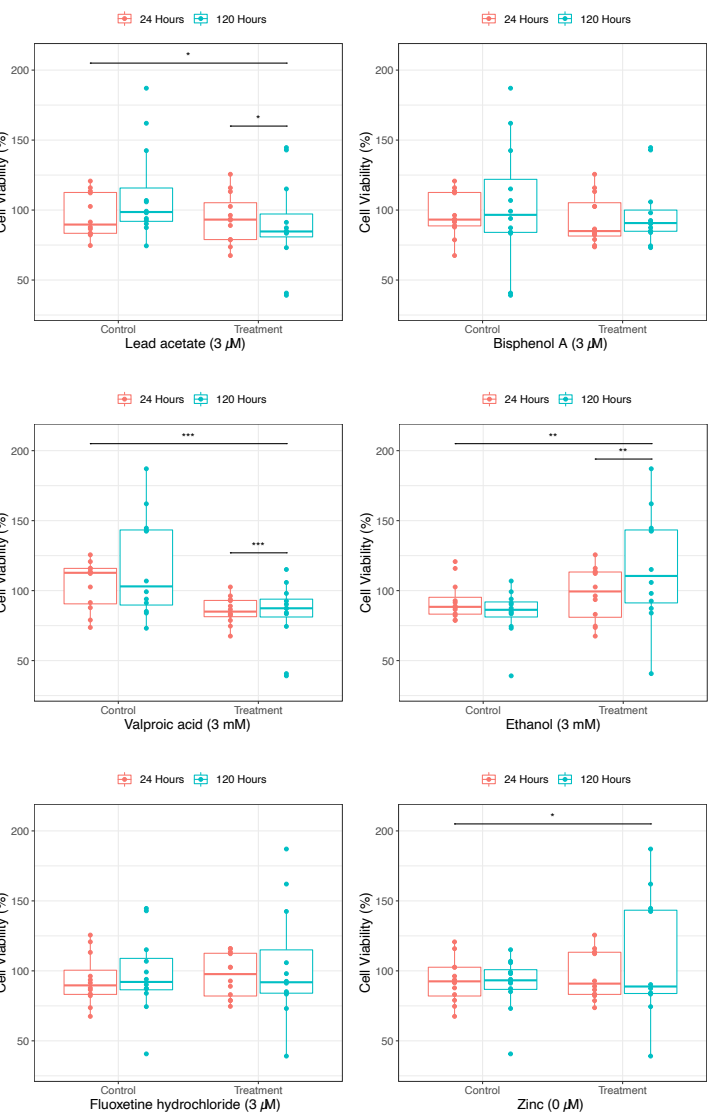

**C** SOX2 immunocytochemistry – fractional factorial experiment design

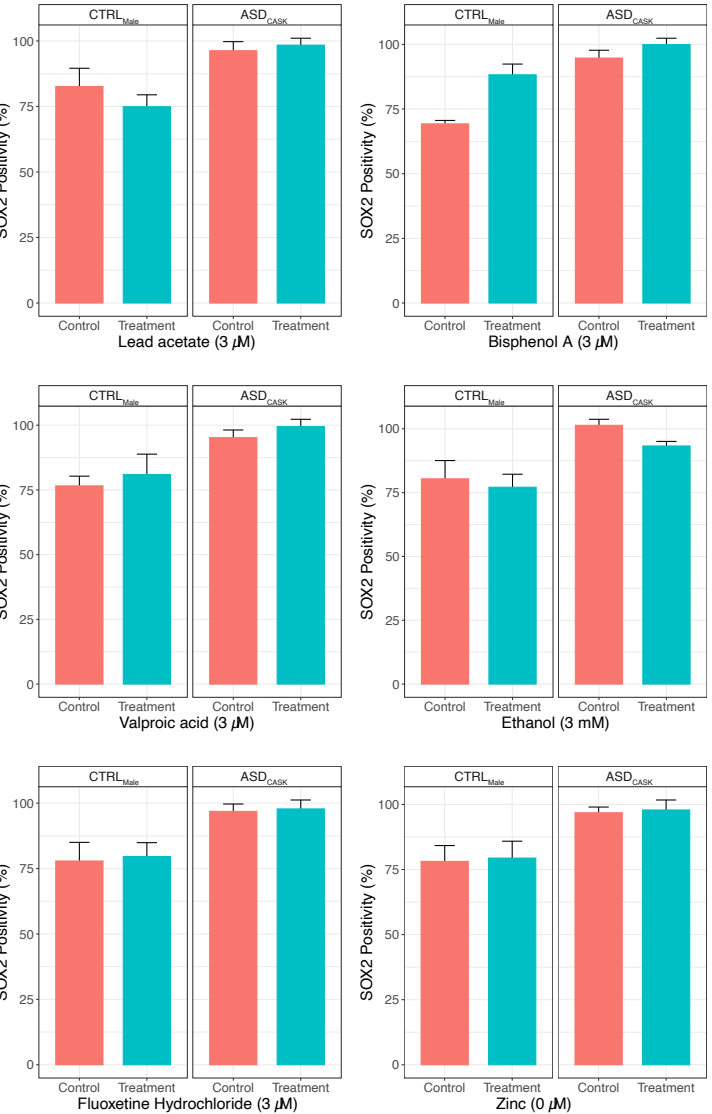

**D** Proliferation assay – fractional factorial experiment design

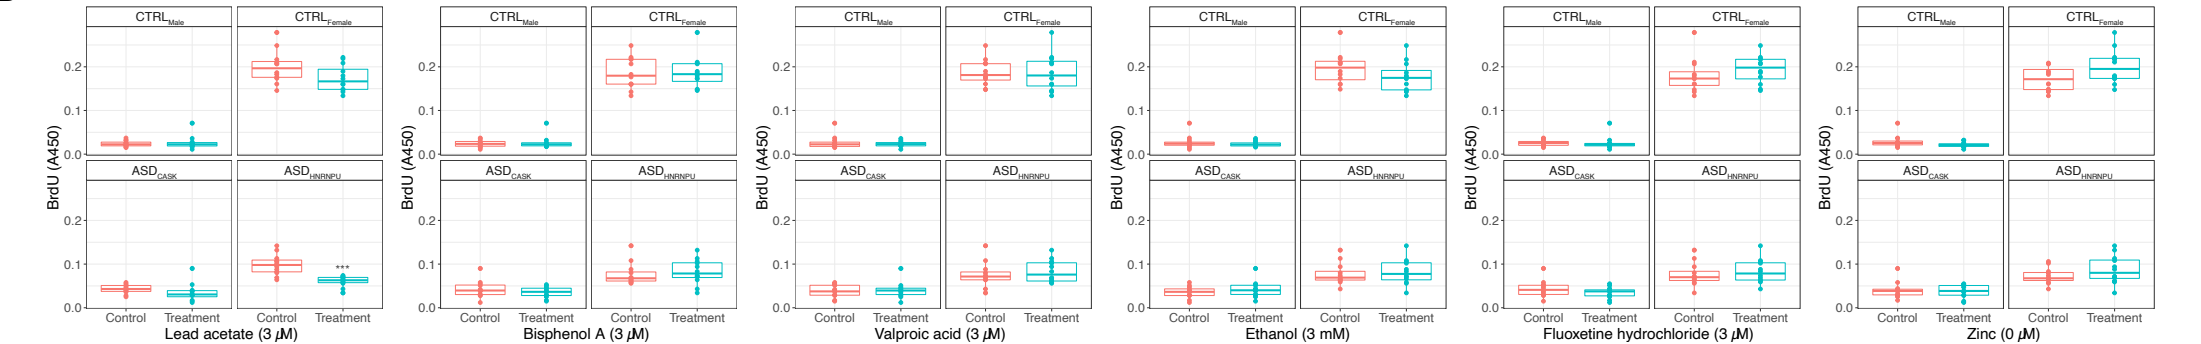

Figure S1

**A** Principal component analysis: Scatter plot for Pb exposure on two Non-ASD and two ASD cell lines (day 5)

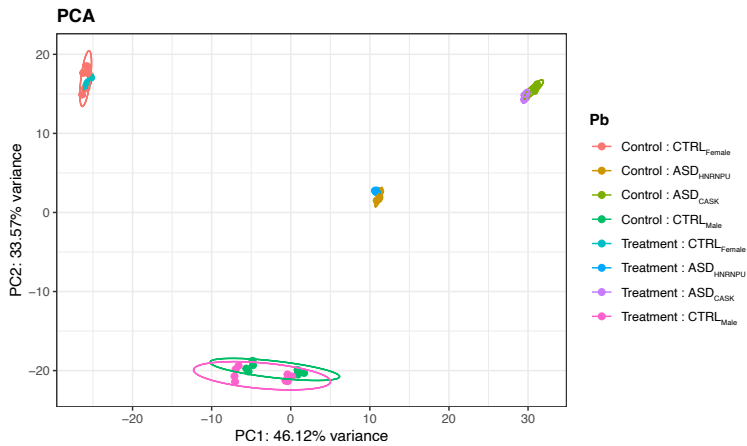

**B** Principal component analysis: Scatter plot for FH exposure on two Non-ASD and two ASD cell lines (day 5)

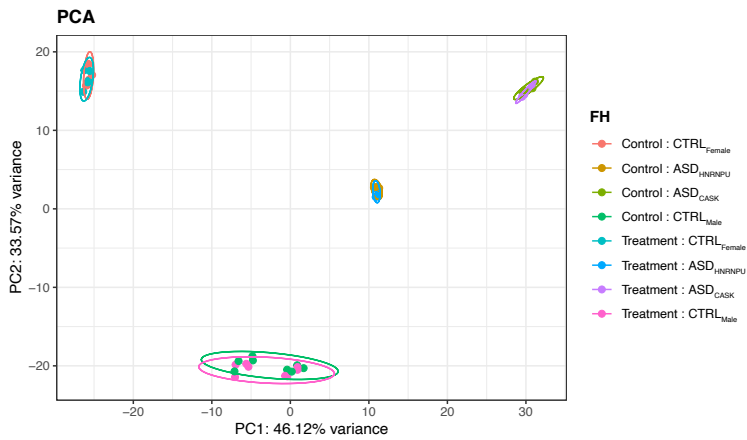

**C** Pb – BrainSpan enrichment: gene dendrogram and time trajectory

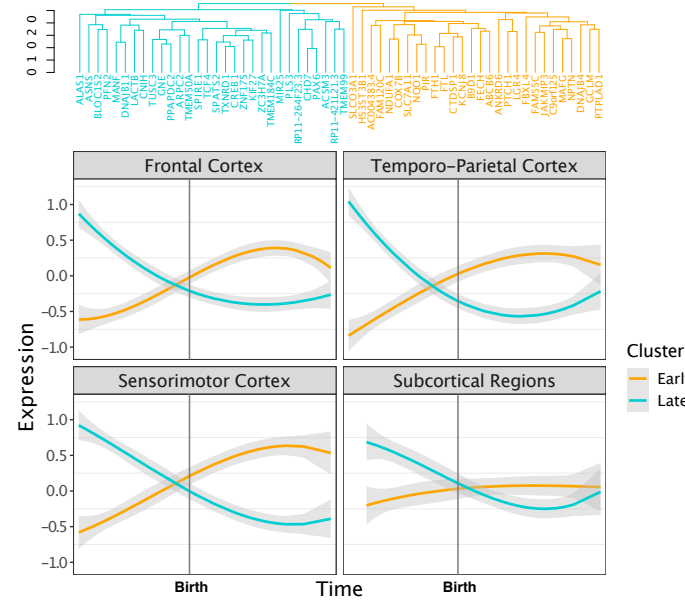

**D** Pb – BrainSpan enrichment: brain region and developmental period

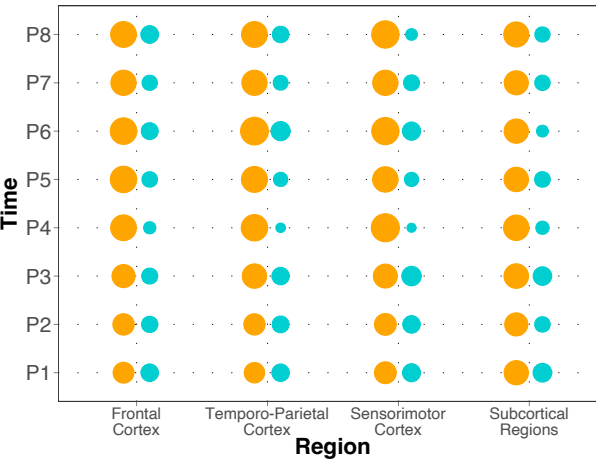

**E** FH – BrainSpan enrichment: gene dendrogram and time trajectory

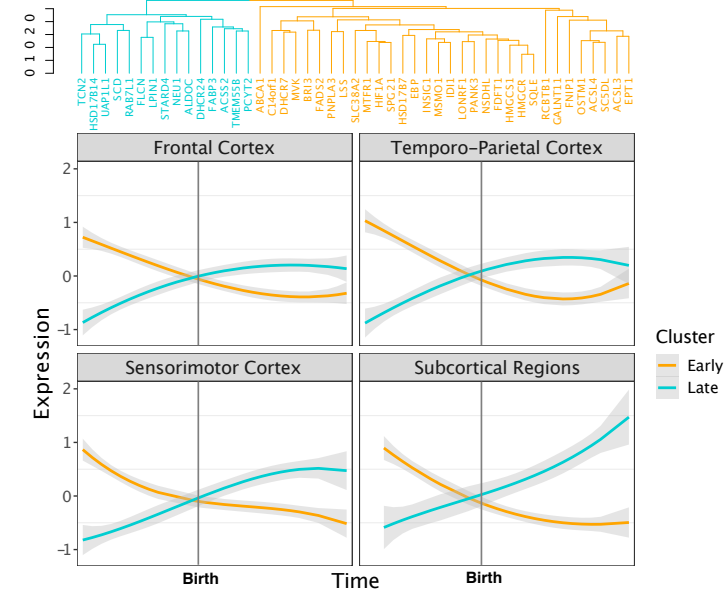

**F** FH – BrainSpan enrichment: brain region and developmental period

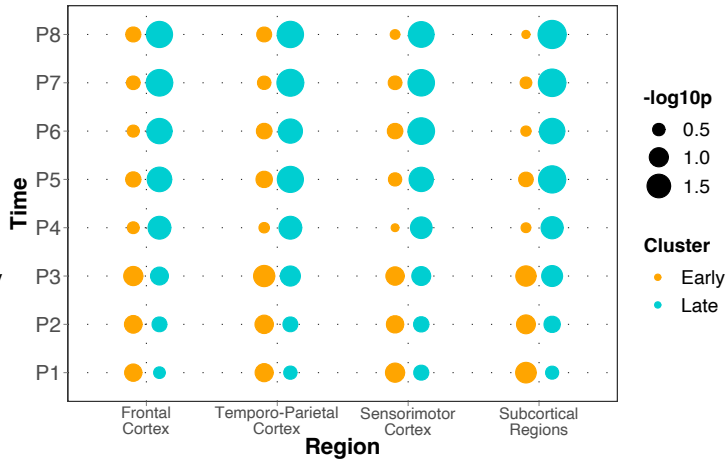



**A** Non-ASD (Level II) metabolites: concentration heatmap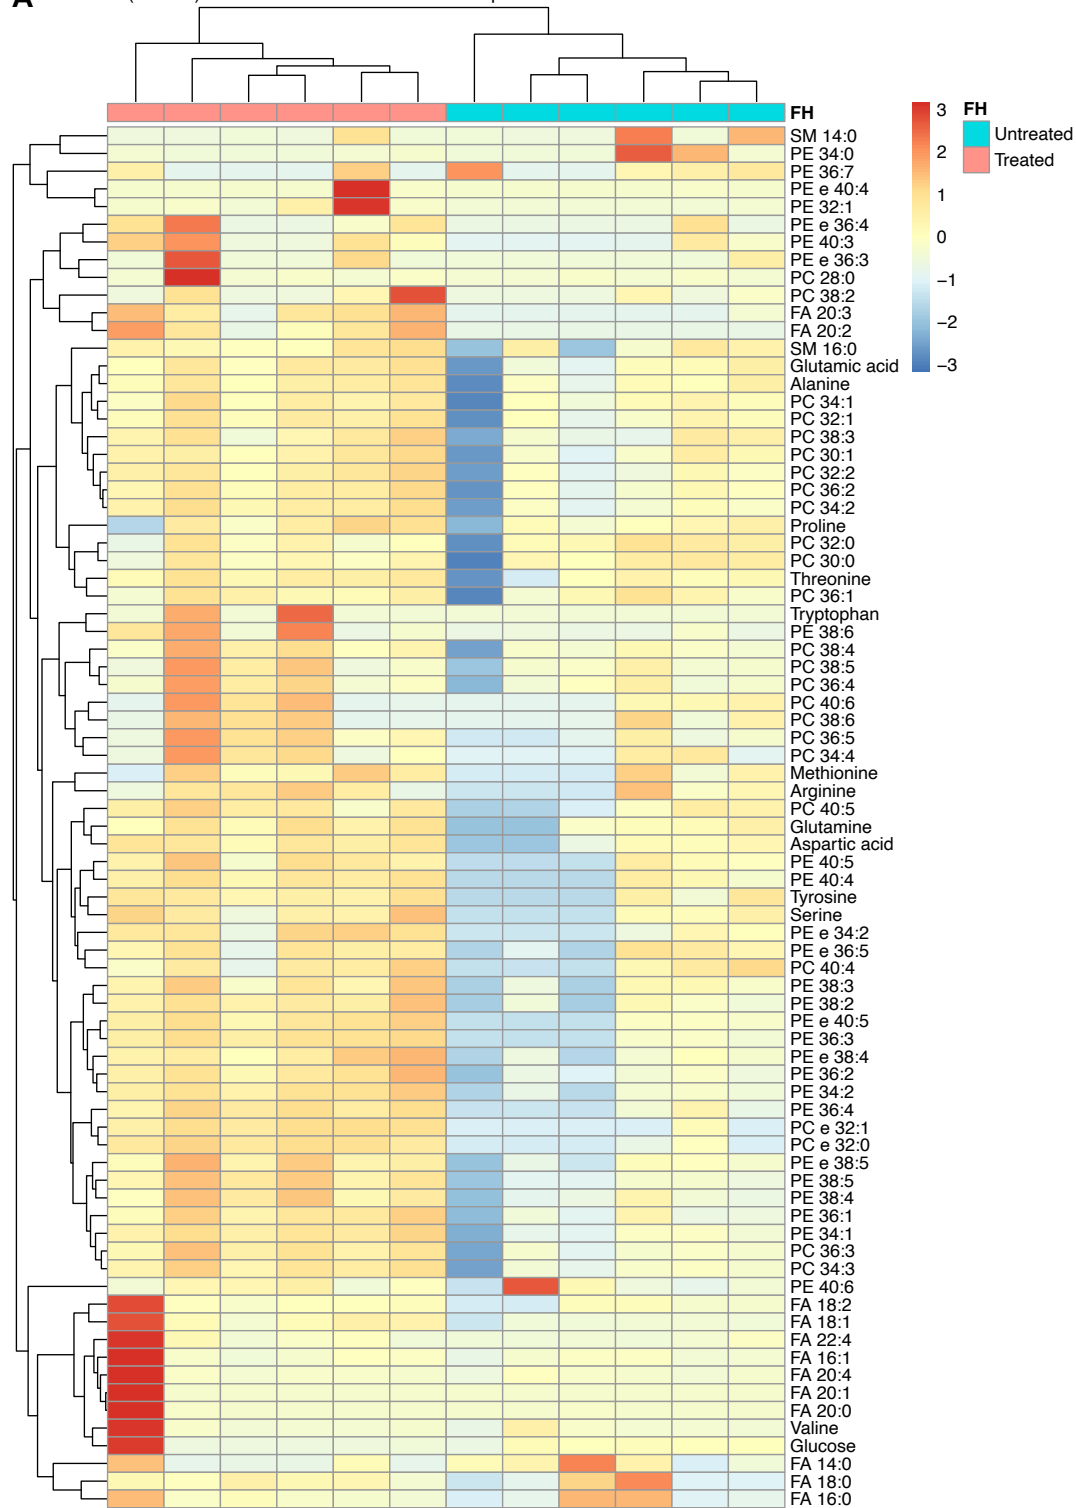**B** ASD (Level II) metabolites: concentration heatmap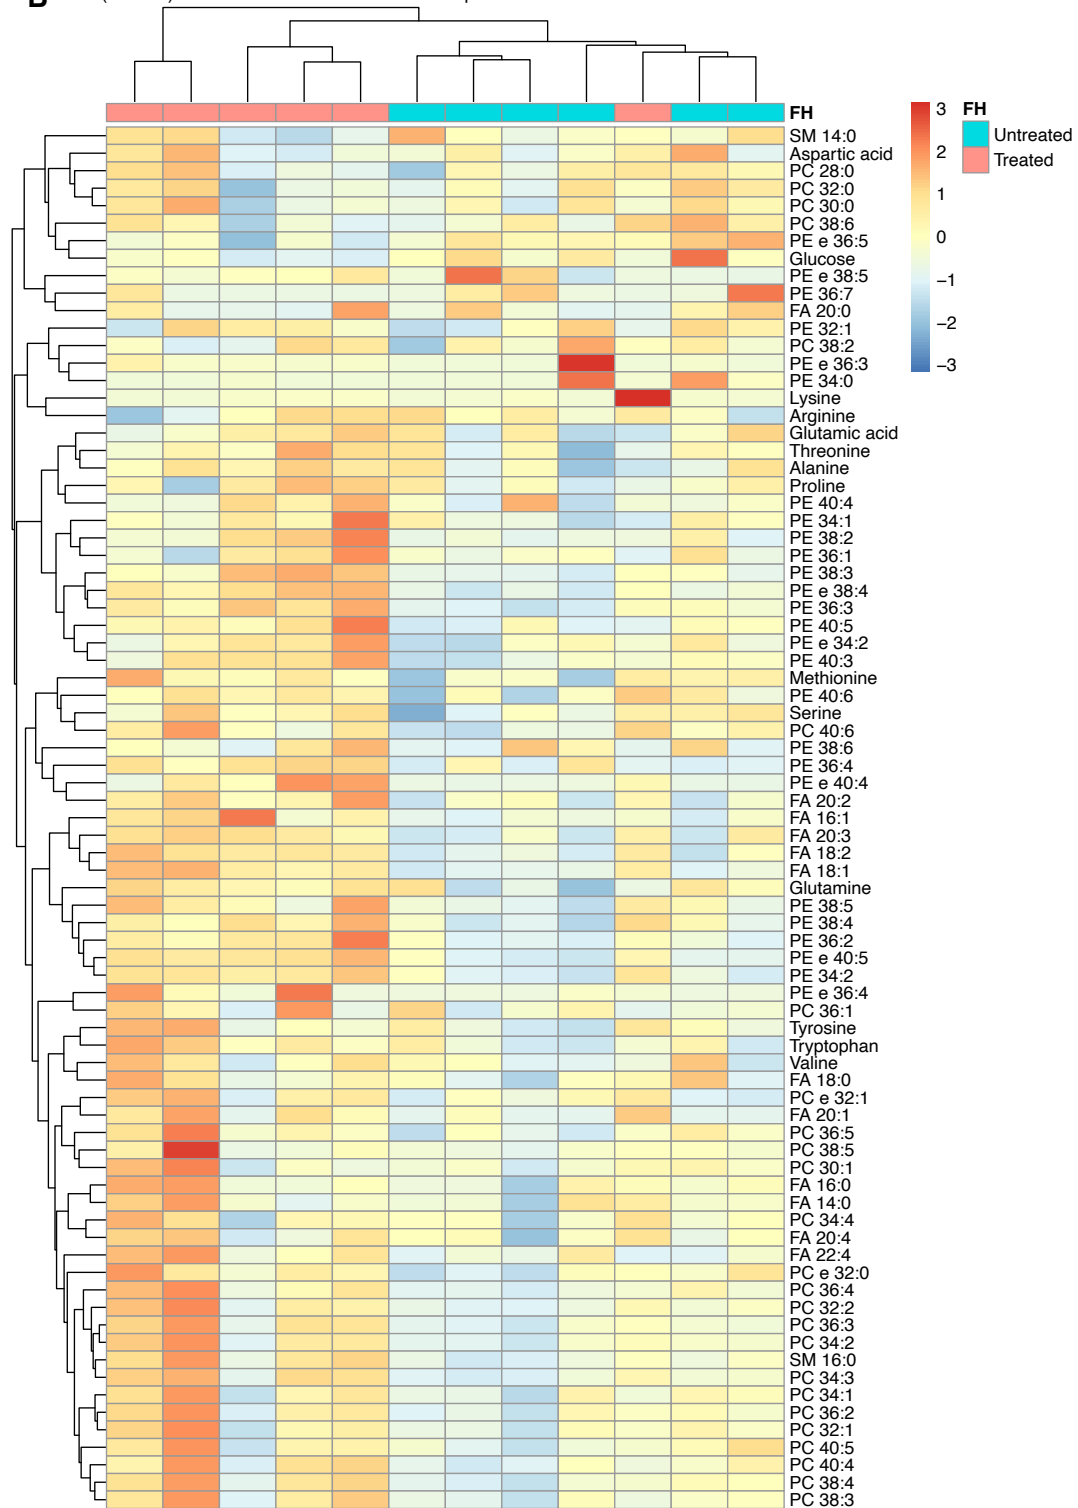**Figure S4**
